# Supplementary material for: Synthesis, DFT Calculations, and In Vitro Antioxidant Study on Novel Carba-Analogs of Vitamin E
Source: PubMed Central journal article supplement (PMC6943657; doi:10.3390/antiox8120589), 2019-11-26

## SUPPORTING INFORMATION

for

# Synthesis, DFT Calculations and In Vitro Antioxidant Study on Novel Carba-Analogs of Vitamin E

Aneta Baj <sup>1</sup>, Jakub Cedrowski <sup>2</sup>, Ewa Olchowik-Grabarek <sup>3</sup>, Artur Ratkiewicz <sup>1</sup> and Stanislaw Witkowski <sup>1,\*</sup>

<sup>1</sup> Faculty of Chemistry, University of Bialystok, Ciolkowskiego 1K, 15-245 Bialystok, Poland

<sup>2</sup> Faculty of Chemistry, University of Warsaw, Pasteura 1, 02-093 Warsaw, Poland

<sup>3</sup> Faculty of Biology, University of Bialystok, Ciolkowskiego 1J, 15-245 Bialystok, Poland

\* Correspondence: wit@uwb.edu.pl (S.W.)

### Table of Contents

|                                                                                                                                                   |         |
|---------------------------------------------------------------------------------------------------------------------------------------------------|---------|
| Synthesis of phosphonium salt <b>9</b>                                                                                                            | S2      |
| Styrene autoxidation inhibited by compounds <b>1a</b> , <b>1b</b> , $\alpha$ - <b>T</b> , <b>1c</b> , <b>4</b> , <b>5</b> and <b>6</b> (Table 1S) | S3      |
| Cumene autoxidation inhibited by compounds <b>4</b> , <b>5</b> and <b>6</b> (Table 2S)                                                            | S4      |
| <sup>1</sup> H and <sup>13</sup> C NMR spectra of compound <b>6</b>                                                                               | S5-S6   |
| <sup>1</sup> H and <sup>13</sup> C NMR spectra of compound <b>7</b>                                                                               | S7-S8   |
| <sup>1</sup> H and <sup>13</sup> C NMR spectra of compound <b>8</b>                                                                               | S9-S10  |
| <sup>1</sup> H and <sup>31</sup> P NMR spectra of compound <b>9</b>                                                                               | S11-S12 |
| <sup>1</sup> H and <sup>13</sup> C NMR spectra of compound <b>11</b>                                                                              | S13-S14 |
| <sup>1</sup> H and <sup>13</sup> C NMR spectra of compound <b>12</b>                                                                              | S15-S16 |
| <sup>1</sup> H NMR spectrum of compound <b>13</b>                                                                                                 | S17     |
| <sup>1</sup> H NMR spectrum of compound <b>14</b>                                                                                                 | S18     |

## Synthesis of phosphonium salt **9**

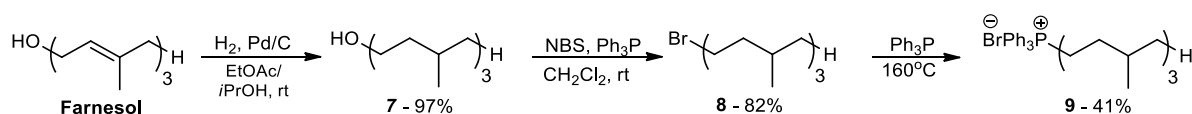

### 3,7,11-Trimethyldodecyl alcohol (**7**).

A mixture of farnesol (3 g, 13.5 mmol) and 10% Pd/C (0.3 g) in ethyl acetate (15 mL) and propan-2-ol (15 mL) was stirred and hydrogenated under atmospheric pressure at room temperature. After 24 h the reaction mixture was filtered through a pad of Celite and concentrated under reduced pressure. Yellow oily residue was purified by DFC (hexane/ethyl acetate, 8:2, v/v) to give compound **7** as a colorless oil (2.98 g, 97%).  $R_f = 0.43$  (hexane/ethyl acetate, 8:2, v/v);  $^1\text{H NMR}$  (400 MHz,  $\text{CDCl}_3$ ):  $\delta$  3.71-3.66 (m, 2H,  $\text{CH}_2\text{OH}$ ), 1.63-1.49 (m, 3H), 1.39-1.04 (m, 15H), 0.90 (d,  $J = 6.5$  Hz, 3H), 0.87 (d,  $J = 6.6$  Hz, 6H), 0.85 (d,  $J = 6.8$  Hz, 3H) ppm;  $^{13}\text{C NMR}$  (100 MHz,  $\text{CDCl}_3$ ):  $\delta$  61.23, 40.03, 39.95, 39.34, 37.48, 37.44, 37.35, 37.31, 37.25, 32.77, 32.76, 29.51, 29.49, 27.96, 24.79, 24.77, 24.35, 22.70, 22.60, 19.72, 19.66, 19.64, 19.60 ppm; IR (ATR): 3336, 2924, 1459, 1054  $\text{cm}^{-1}$ .

### 3,7,11-Trimethyldodecyl bromide (**8**).

Compound **8** was prepared according to the method proposed by Sagara et al. with minor modifications [1]. NBS (2.705 g, 15.2 mmol) was added portionwise to a solution of compound **7** (2.9 g, 12.7 mmol) and  $\text{Ph}_3\text{P}$  (3.672 g, 14.0 mmol) in dry  $\text{CH}_2\text{Cl}_2$  (50 mL) under argon at  $0^\circ\text{C}$ . After stirring for 18 h at room temperature solvent was removed with a rotary evaporator. The residue was dispersed in hexane and purified by FC (hexane as eluent) to obtain bromide **8** as a colorless oil (3.05 g, 82%).  $R_f = 0.91$  (hexane).  $^1\text{H NMR}$  (400 MHz,  $\text{CDCl}_3$ ):  $\delta$  3.51-3.38 (m, 2H,  $\text{CH}_2\text{Br}$ ), 1.90-1.87 (m, 1H), 1.71-1.64 (m, 2H), 1.57-1.50 (m, 1H), 1.48-1.02 (m, 13H), 0.90 (d,  $J = 6.2$  Hz, 3H), 0.88 (d,  $J = 6.7$  Hz, 6H), 0.85 (d,  $J = 6.4$  Hz, 3H) ppm;  $^{13}\text{C NMR}$  (100 MHz,  $\text{CDCl}_3$ ):  $\delta$  40.10, 40.03, 39.34, 37.35, 37.27, 37.24, 37.21, 36.83, 36.76, 32.75, 32.73, 32.22, 31.67, 31.63, 27.97, 24.80, 24.79, 24.21, 22.71, 22.62, 19.72, 19.65, 18.99, 18.93 ppm; IR (ATR): 2924, 1459, 1378, 1259, 614  $\text{cm}^{-1}$ .

### Triphenyl(3,7,11-trimethyldodecyl)phosphonium bromide (**9**).

Mixture of bromide **8** (2.75 g, 9.4 mmol) and  $\text{Ph}_3\text{P}$  (2.473 g, 9.4 mmol) was stirred vigorously at  $160^\circ\text{C}$  for 24 h. After cooling to room temperature,  $\text{Et}_2\text{O}$  was added and concentrated under reduced pressure. White solid was triturated with cold ether, filtered, washed with cold ether and dried under high vacuum ( $80^\circ\text{C}$ , 24 h) to give product **9** as a white solid (2.132 g, yield 41%).  $^{31}\text{P NMR}$  (161 MHz,  $\text{CDCl}_3$ ):  $\delta$  25.26 ppm;  $^1\text{H NMR}$  (400 MHz,  $\text{CDCl}_3$ ):  $\delta$  7.86-7.42 (m, 15H), 3.71-3.65 (m, 2H), 2.03 (brs, 1H), 1.77-1.75 (m, 1H), 1.60-1.52 (m, 1H), 1.51-1.47 (m, 1H), 1.46-1.40 (m, 1H), 1.40-0.99 (m, 12H), 0.97 (d,  $J = 6.6$  Hz, 3H), 0.84 (d,  $J = 6.6$  Hz, 6H), 0.77 (d,  $J = 6.6$  Hz, 3H) ppm;  $^{13}\text{C NMR}$  (100 MHz,  $\text{CDCl}_3$ ):  $\delta$  135.00, 134.97, 133.71, 133.61, 130.52, 130.40, 118.73, 117.88, 39.27, 37.26, 37.18, 37.17, 37.13, 36.66, 33.59, 33.56, 33.44, 33.42, 32.70, 29.43, 29.38, 29.34, 29.29, 27.89, 24.73, 24.70, 24.17, 24.13, 22.66, 22.56, 21.17, 20.67, 19.63, 19.51, 19.21, 19.15 ppm; IR (KBr): 2934, 1530, 1404, 1104, 701  $\text{cm}^{-1}$ ; MS (ESI<sup>+</sup>):  $m/z = 473.1$  ( $[\text{M}-\text{Br}]^+$ ).

1. Sagara, Y.; Kato, T. Brightly Tricolored Mechanochromic Luminescence from a Single-Luminophore Liquid Crystal: Reversible Writing and Erasing of Images. *Angew. Chem. Int. Ed.* **2011**, *50*, 9128–9132.

**Table 1S.** The values of inhibition rate constant ( $k_{inh} / M^{-1}s^{-1}$ ), number of peroxy radicals trapped by one molecule of antioxidant ( $n$ ) and the length of induction period ( $\tau / s$ ) calculated for autoxidation of styrene in chlorobenzene at 30°C, inhibited by compounds **1a**, **1b**,  $\alpha$ -**T**, **1c**, **4**, **5** and **6**.

| Structure of phenol                                                                                      | No. | $k_{inh}$<br>[ $M^{-1}s^{-1}$ ] | $n$                                             | $\tau$ [s]                        | ArOH<br>[ $\mu M$ ] |
|----------------------------------------------------------------------------------------------------------|-----|---------------------------------|-------------------------------------------------|-----------------------------------|---------------------|
| 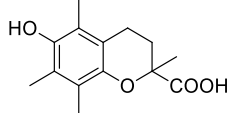<br><b>1a</b>           | 1   | $9.06 \times 10^5$              | 1.60                                            | 1450                              | 5.02                |
|                                                                                                          | 2   | $9.41 \times 10^5$              | 1.55                                            | 1404                              | 5.02                |
|                                                                                                          | 3   | $8.56 \times 10^5$              | 1.77                                            | 1610                              | 5.02                |
|                                                                                                          |     |                                 | <b><math>(9.01 \pm 0.43) \times 10^5</math></b> | <b><math>1.64 \pm 0.12</math></b> |                     |
| <br><b>1b</b>           | 1   | $1.35 \times 10^6$              | 1.61                                            | 1489                              | 5.10                |
|                                                                                                          | 2   | $1.54 \times 10^6$              | 1.73                                            | 1594                              | 5.10                |
|                                                                                                          | 3   | $1.50 \times 10^6$              | 1.74                                            | 1607                              | 5.10                |
|                                                                                                          |     |                                 | <b><math>(1.46 \pm 0.10) \times 10^6</math></b> | <b><math>1.69 \pm 0.07</math></b> |                     |
| <br>$\alpha$ - <b>T</b> | 1   | $1.87 \times 10^6$              | 1.94                                            | 1778                              | 5.07                |
|                                                                                                          | 2   | $2.27 \times 10^6$              | 1.87                                            | 1712                              | 5.07                |
|                                                                                                          | 3   | $1.91 \times 10^6$              | 1.89                                            | 1729                              | 5.07                |
|                                                                                                          |     |                                 | <b><math>(2.02 \pm 0.22) \times 10^6</math></b> | <b><math>1.90 \pm 0.04</math></b> |                     |
| <br><b>1c</b>           | 1   | $2.15 \times 10^6$              | 1.92                                            | 1732                              | 4.99                |
|                                                                                                          | 2   | $2.33 \times 10^6$              | 1.84                                            | 1657                              | 4.99                |
|                                                                                                          | 3   | $2.26 \times 10^6$              | 1.90                                            | 1717                              | 4.99                |
|                                                                                                          |     |                                 | <b><math>(2.24 \pm 0.09) \times 10^6</math></b> | <b><math>1.89 \pm 0.04</math></b> |                     |
| <br><b>4</b>          | 1   | $2.83 \times 10^5$              | 1.51                                            | 1452                              | 5.33                |
|                                                                                                          | 2   | $2.75 \times 10^5$              | 1.48                                            | 1342                              | 5.01                |
|                                                                                                          | 3   | $2.88 \times 10^5$              | 1.66                                            | 1508                              | 5.01                |
|                                                                                                          |     |                                 | <b><math>(2.82 \pm 0.07) \times 10^5</math></b> | <b><math>1.55 \pm 0.10</math></b> |                     |
| <br><b>5</b>          | 1   | $3.06 \times 10^5$              | 1.53                                            | 1051                              | 3.80                |
|                                                                                                          | 2   | $3.31 \times 10^5$              | 1.30                                            | 1781                              | 7.56                |
|                                                                                                          | 3   | $2.88 \times 10^5$              | 1.31                                            | 1796                              | 7.56                |
|                                                                                                          |     |                                 | <b><math>(3.08 \pm 0.22) \times 10^5</math></b> | <b><math>1.38 \pm 0.13</math></b> |                     |
| <br><b>6</b>          | 1   | $2.92 \times 10^5$              | 1.55                                            | 1371                              | 4.03                |
|                                                                                                          | 2   | $2.02 \times 10^5$              | 1.46                                            | 863                               | 2.69                |
|                                                                                                          | 3   | $2.09 \times 10^5$              | 1.60                                            | 944                               | 2.69                |
|                                                                                                          |     |                                 | <b><math>(2.34 \pm 0.50) \times 10^5</math></b> | <b><math>1.54 \pm 0.07</math></b> |                     |

**Table 2S.** The values of inhibition rate constant ( $k_{inh} / M^{-1}s^{-1}$ ), number of peroxy radicals trapped by one molecule of antioxidant ( $n$ ) and the length of induction period ( $\tau / s$ ) calculated for autoxidation of cumene in chlorobenzene at 30°C, inhibited by compounds **4**, **5** and **6**.

| Structure of phenol                                                                           | No. | $k_{inh}$<br>[ $M^{-1}s^{-1}$ ]                 | $n$                               | $\tau$ [s] | ArOH<br>[ $\mu M$ ] |
|-----------------------------------------------------------------------------------------------|-----|-------------------------------------------------|-----------------------------------|------------|---------------------|
| 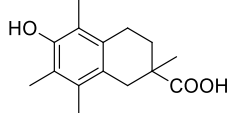<br><b>4</b> | 1   | $2.74 \times 10^5$                              | 1.50                              | 1258       | 3.81                |
|                                                                                               | 2   | $2.77 \times 10^5$                              | 1.58                              | 1764       | 5.08                |
|                                                                                               | 3   | $2.14 \times 10^5$                              | 1.53                              | 1711       | 5.08                |
|                                                                                               |     | <b><math>(2.55 \pm 0.36) \times 10^5</math></b> | <b><math>1.54 \pm 0.04</math></b> |            |                     |
| <br><b>5</b> | 1   | $2.95 \times 10^5$                              | 1.59                              | 1614       | 4.64                |
|                                                                                               | 2   | $3.26 \times 10^5$                              | 1.75                              | 1779       | 4.64                |
|                                                                                               | 3   | $3.11 \times 10^5$                              | 1.77                              | 1804       | 4.64                |
|                                                                                               |     | <b><math>(3.11 \pm 0.16) \times 10^5</math></b> | <b><math>1.70 \pm 0.10</math></b> |            |                     |
| <br><b>6</b> | 1   | $2.92 \times 10^5$                              | 1.55                              | 1371       | 4.03                |
|                                                                                               | 2   | $2.02 \times 10^5$                              | 1.46                              | 863        | 2.69                |
|                                                                                               | 3   | $2.09 \times 10^5$                              | 1.60                              | 944        | 2.69                |
|                                                                                               |     | <b><math>(2.34 \pm 0.50) \times 10^5</math></b> | <b><math>1.54 \pm 0.07</math></b> |            |                     |

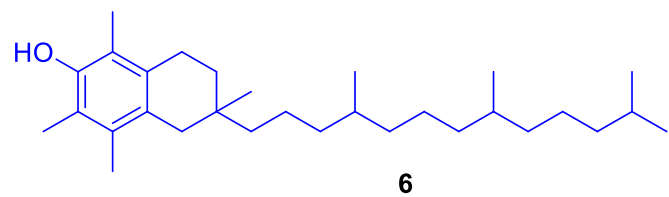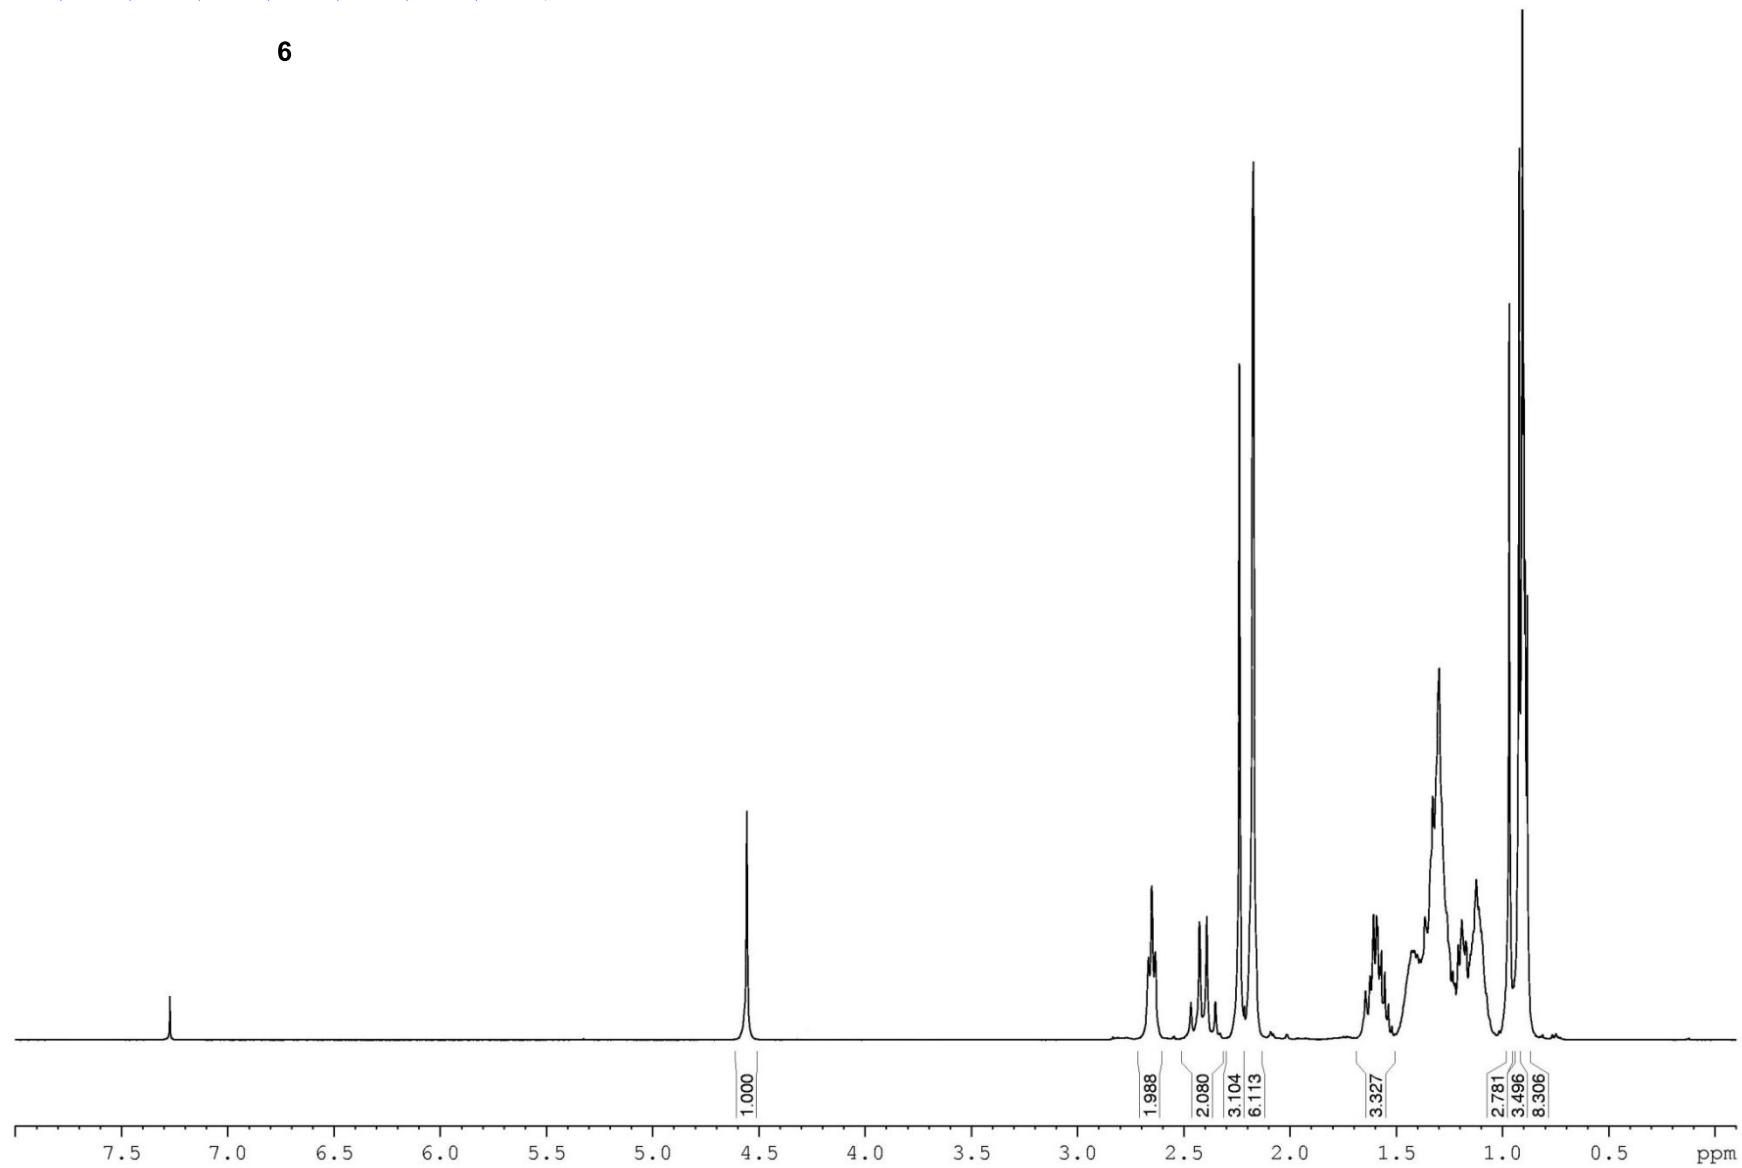

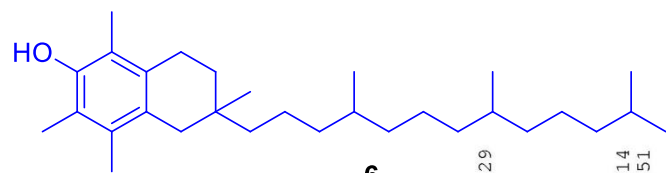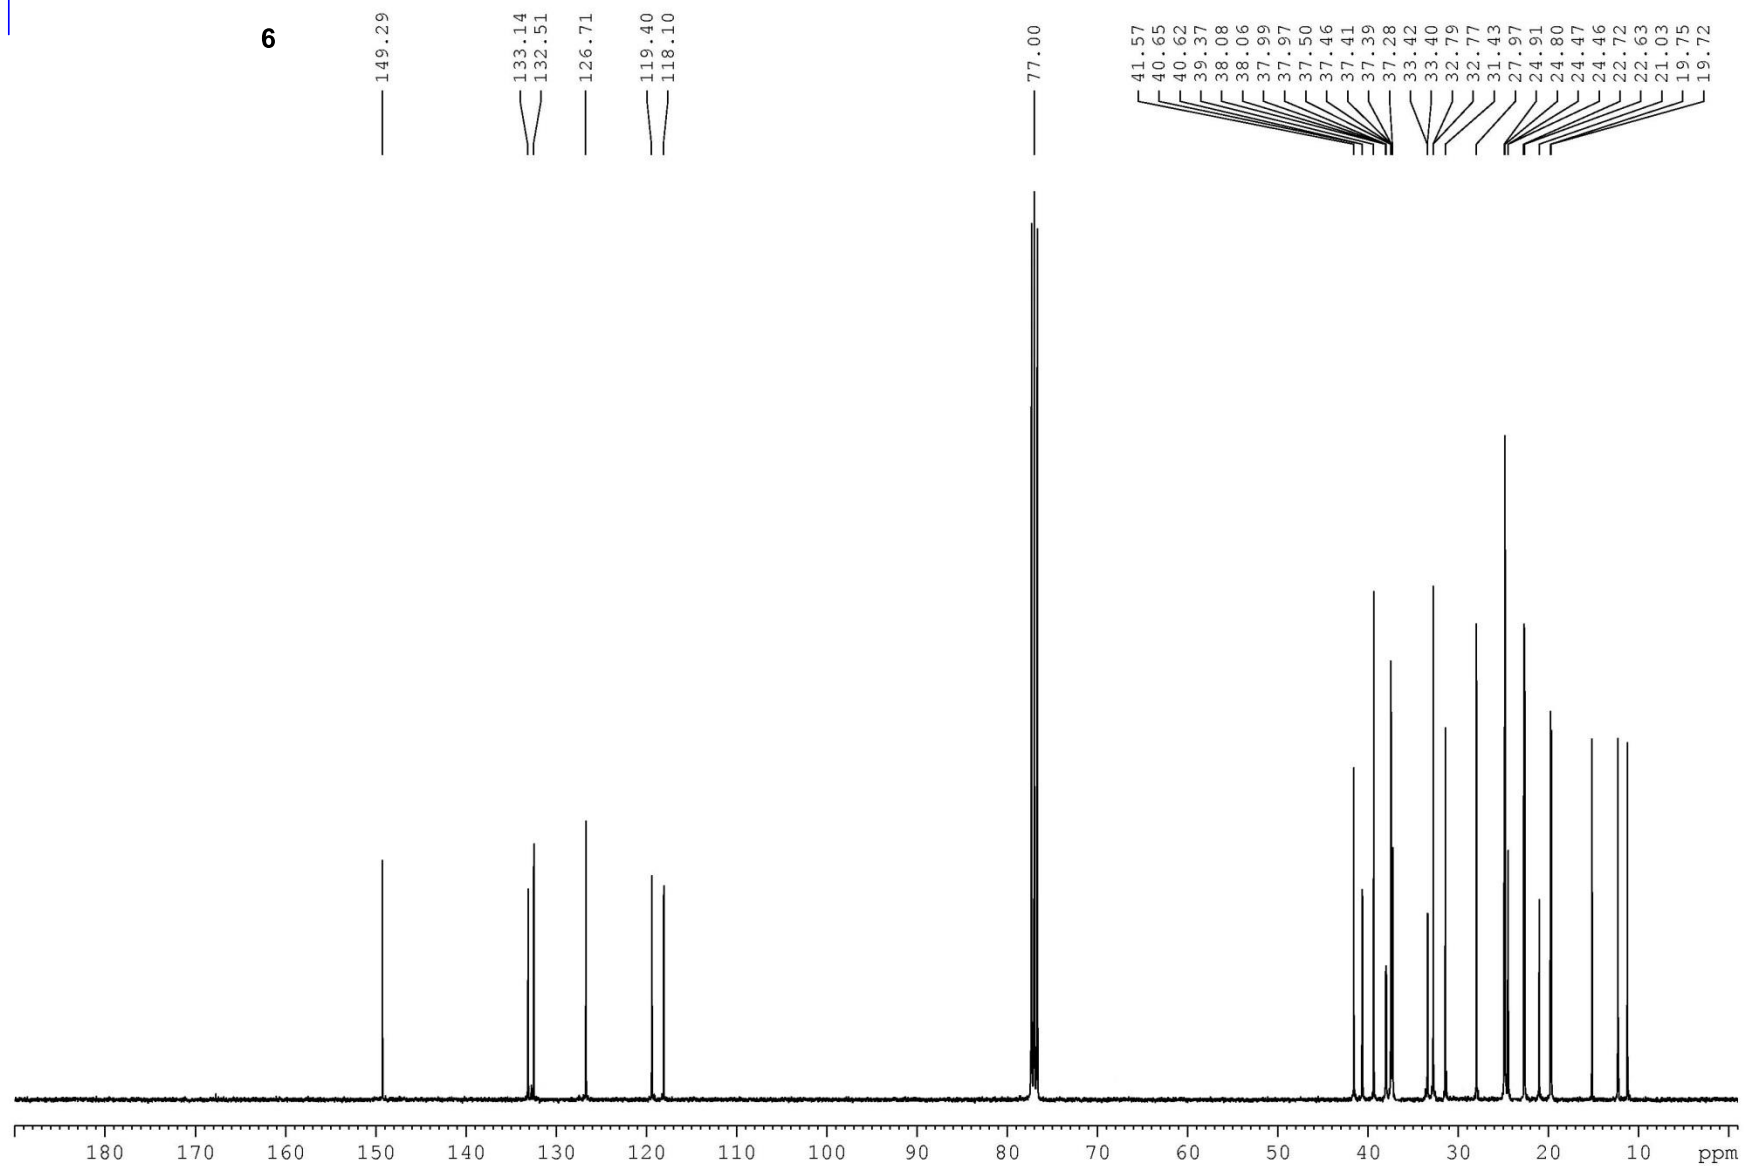

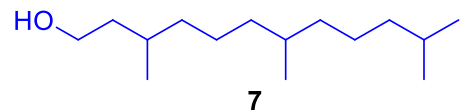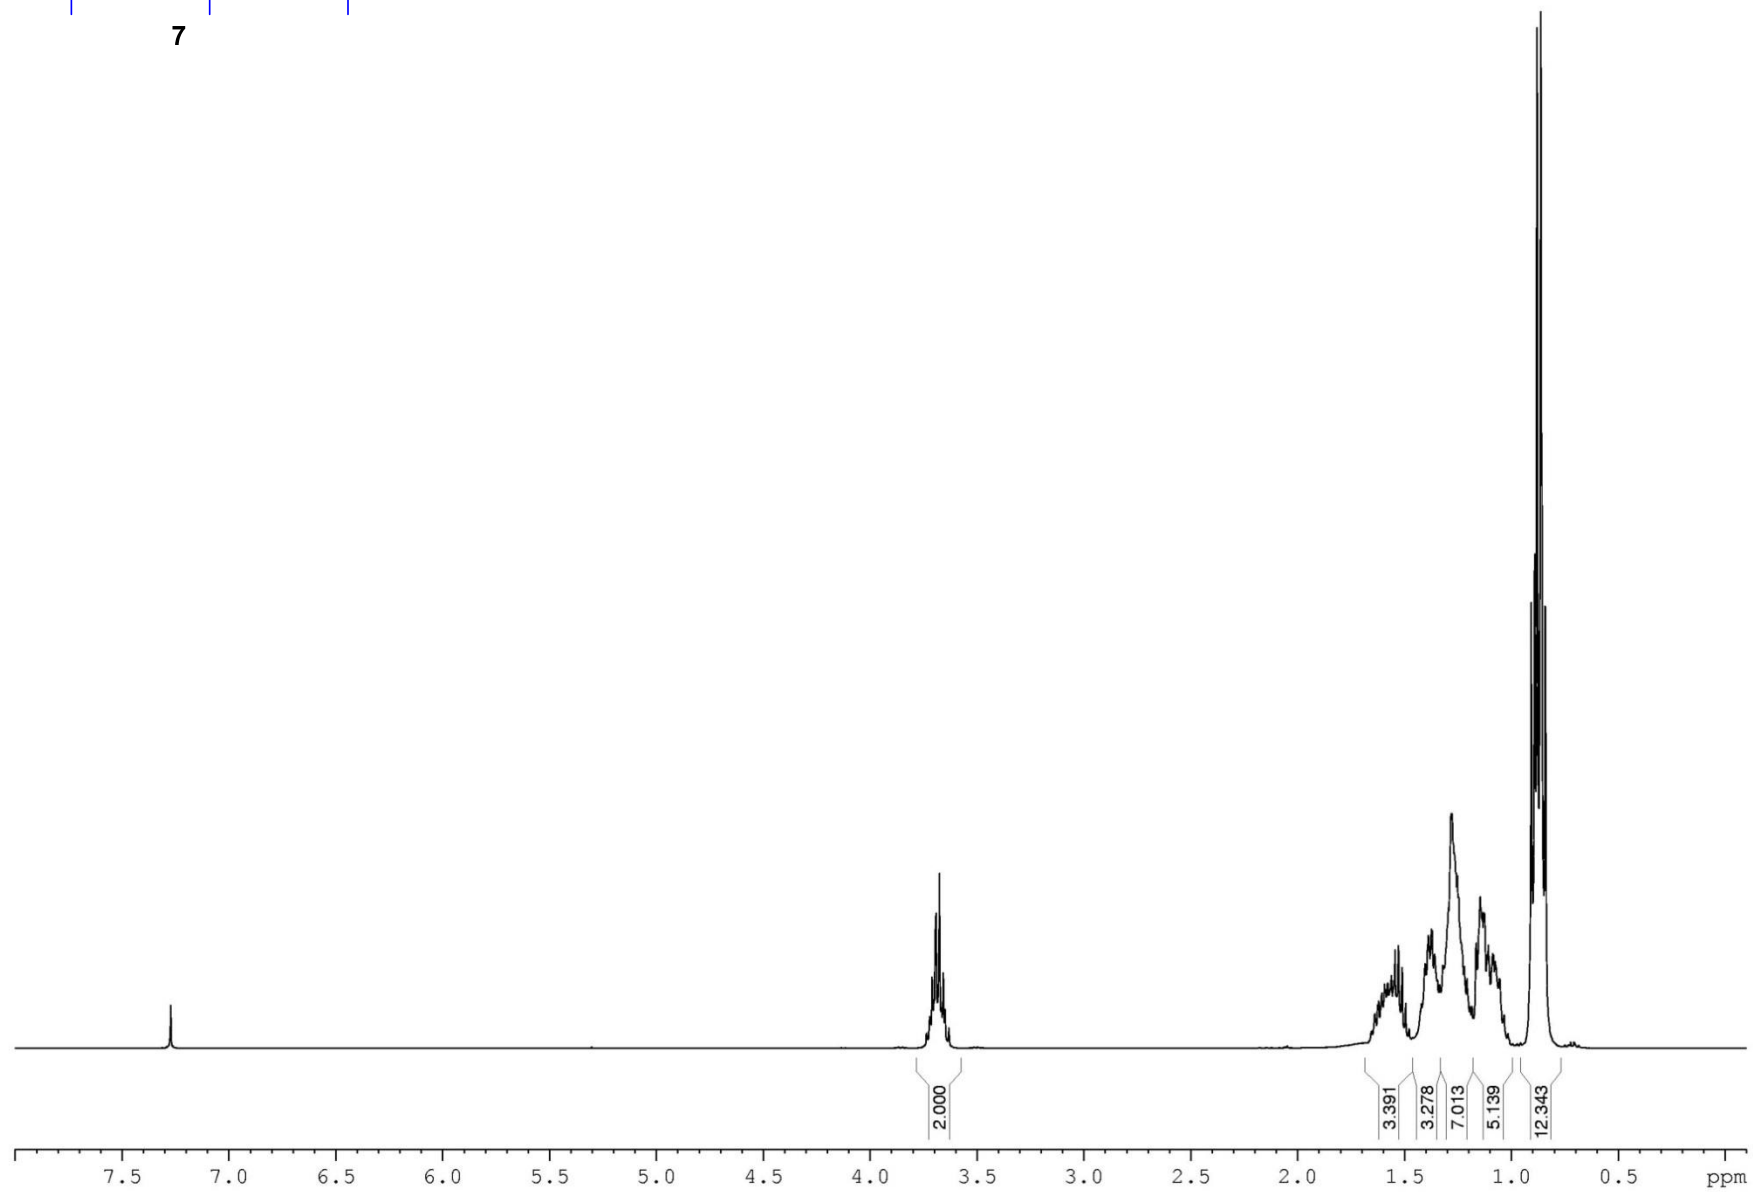

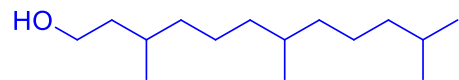

7

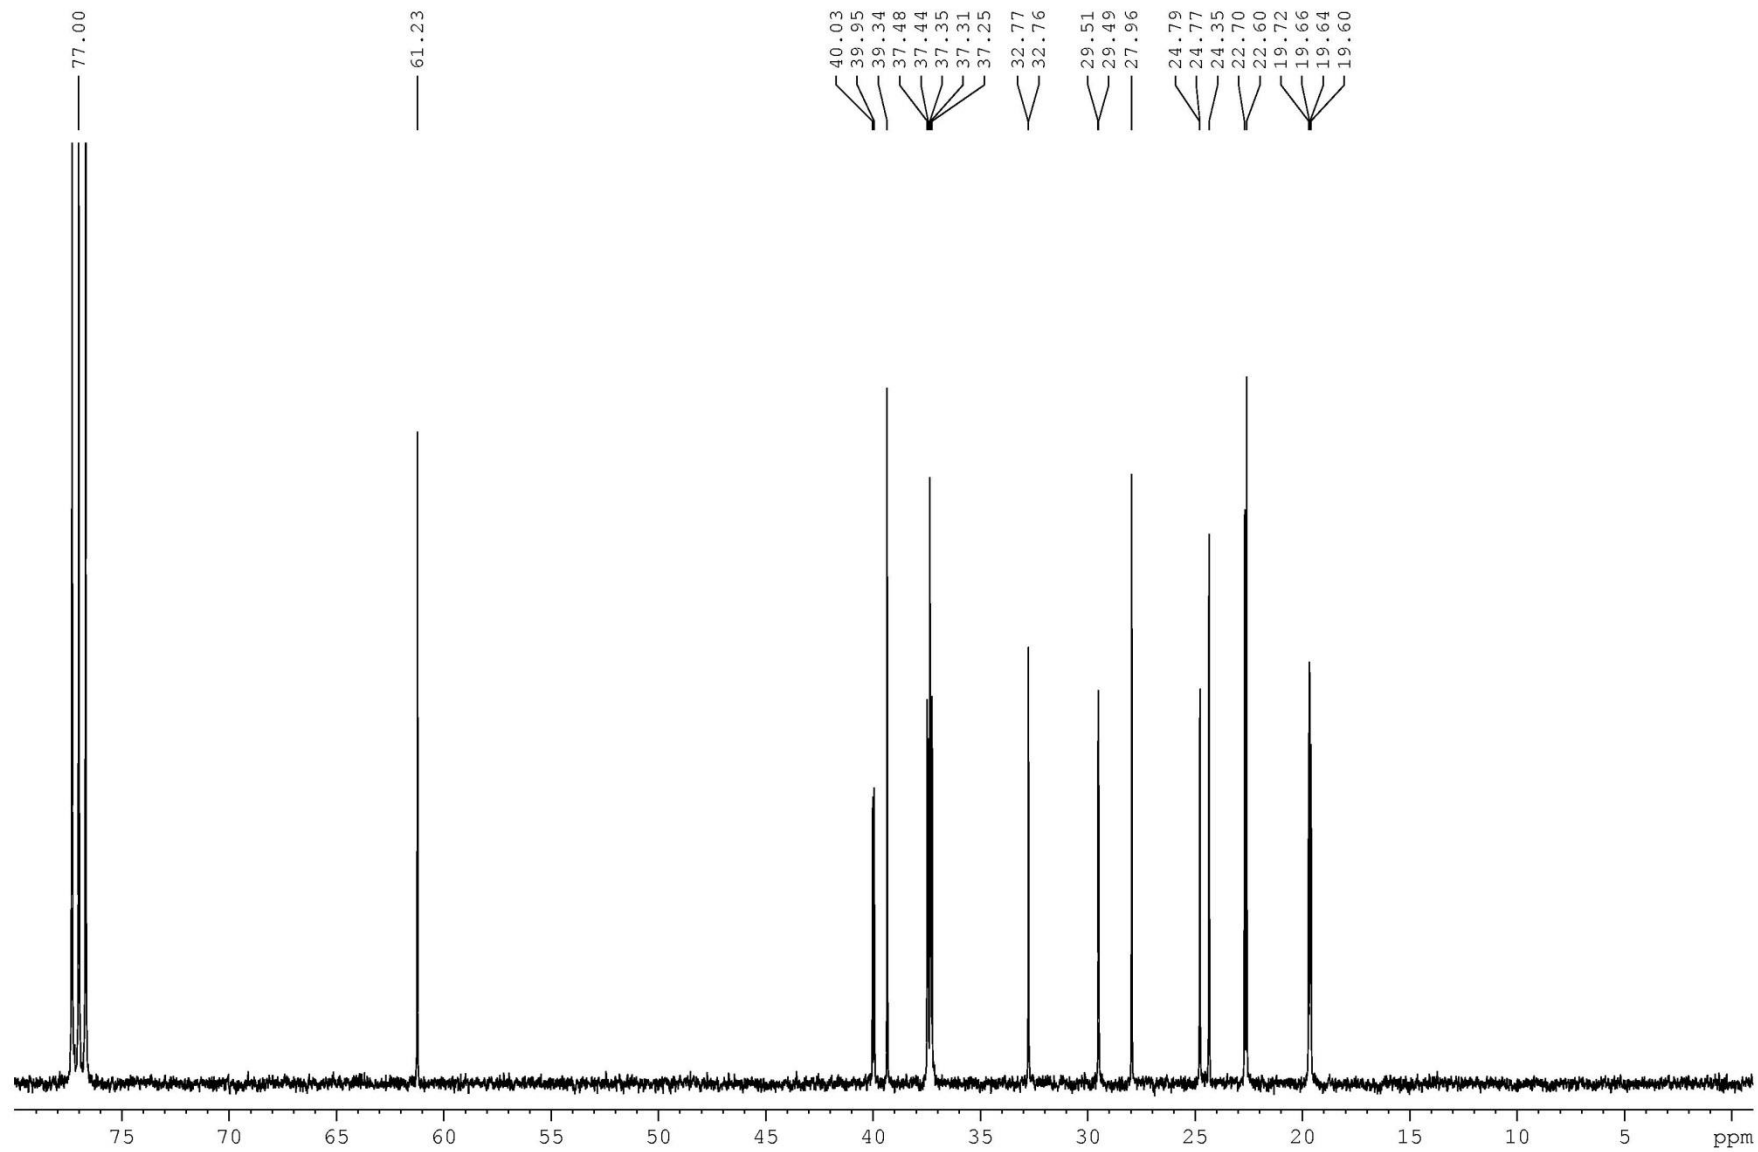



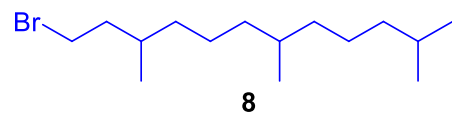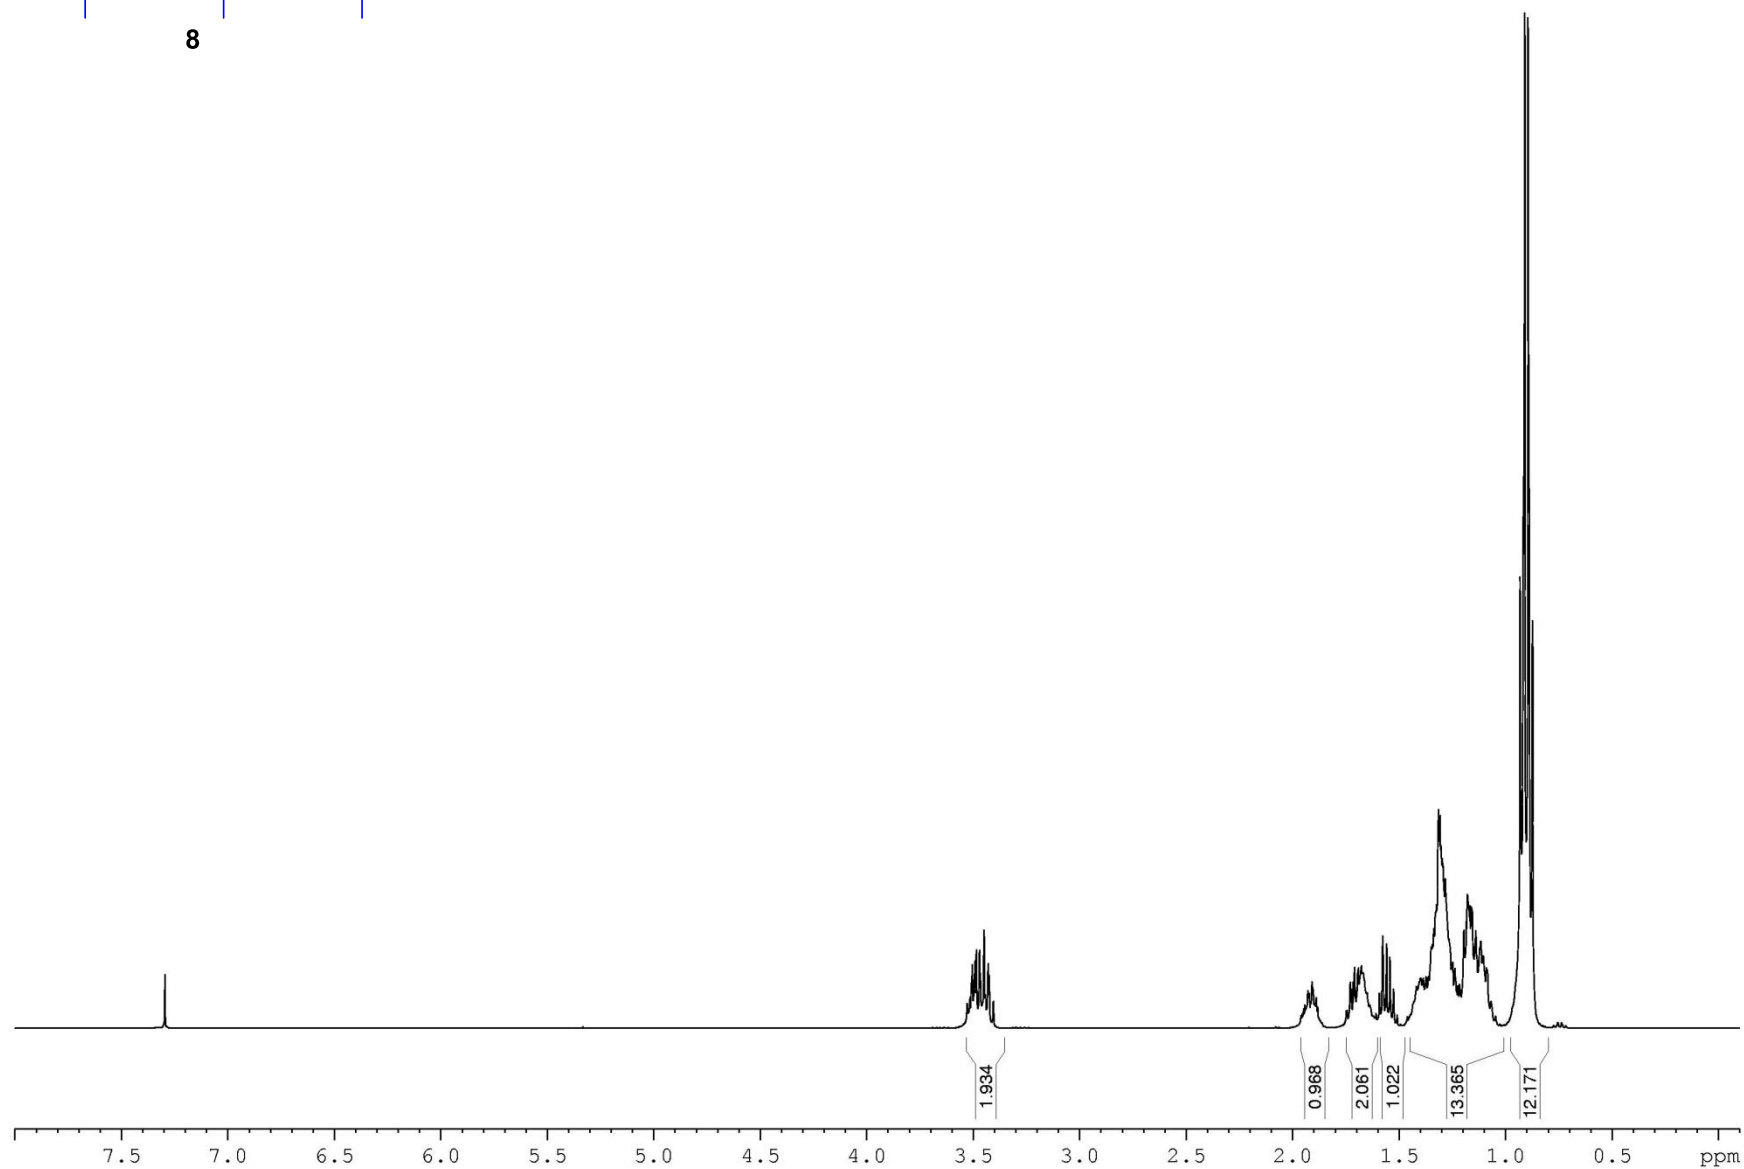

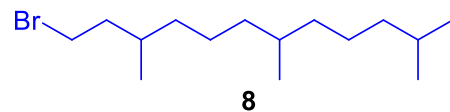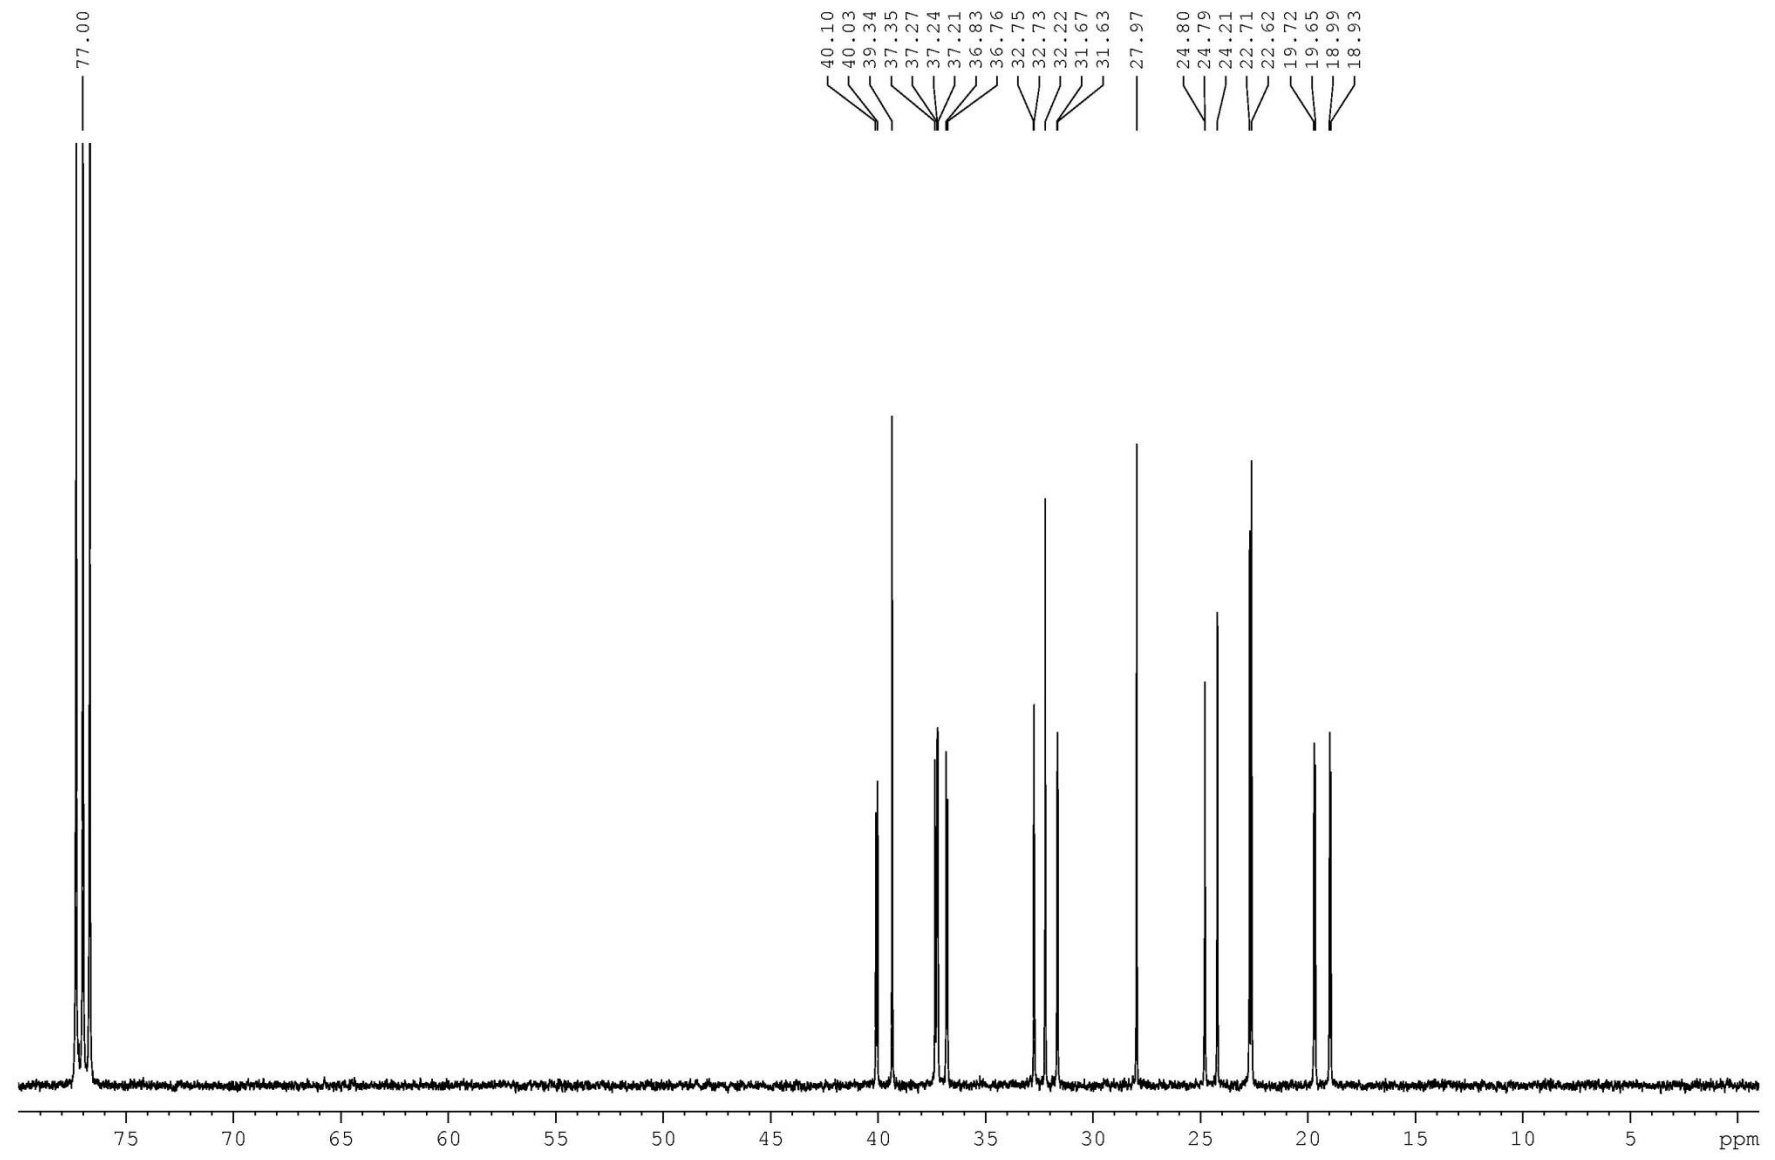

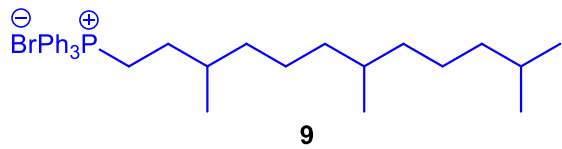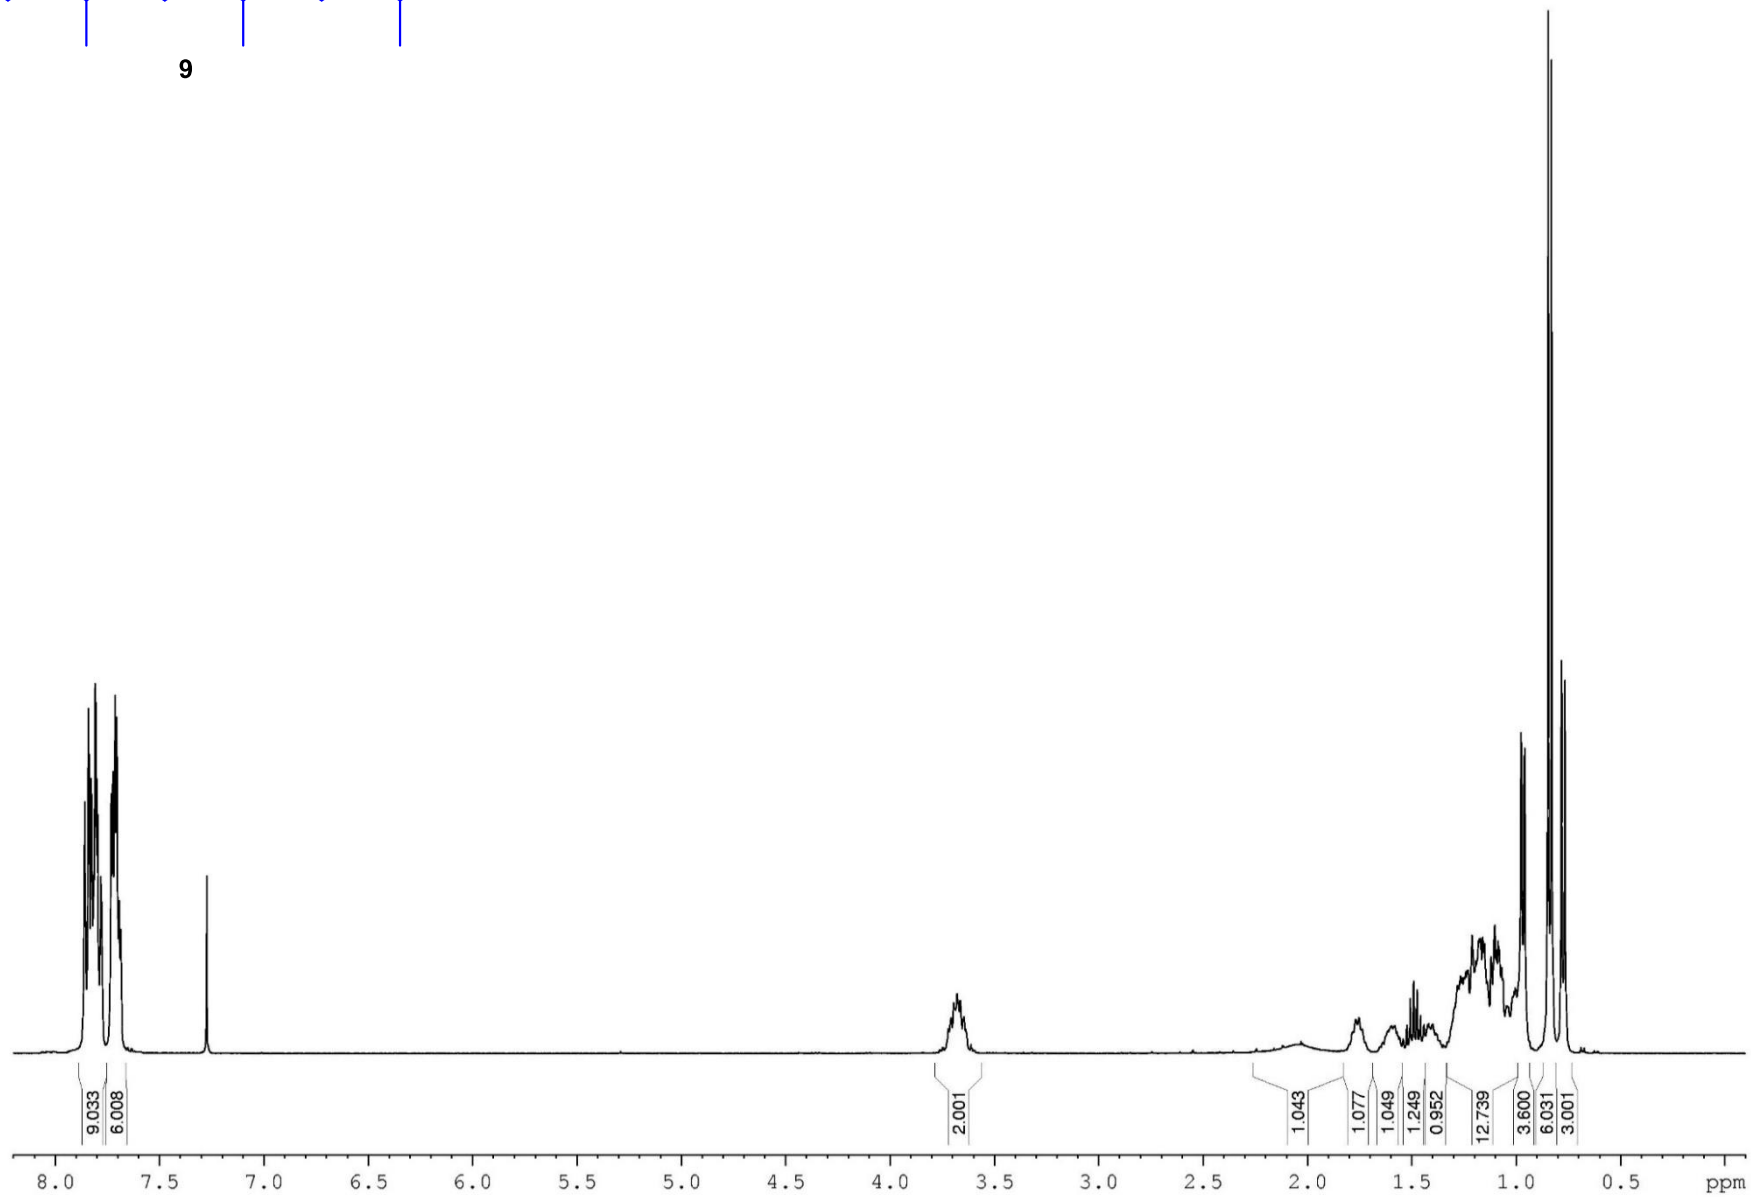

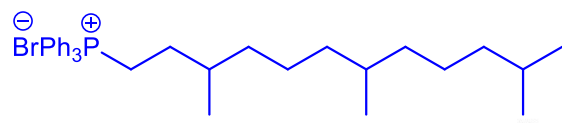

9

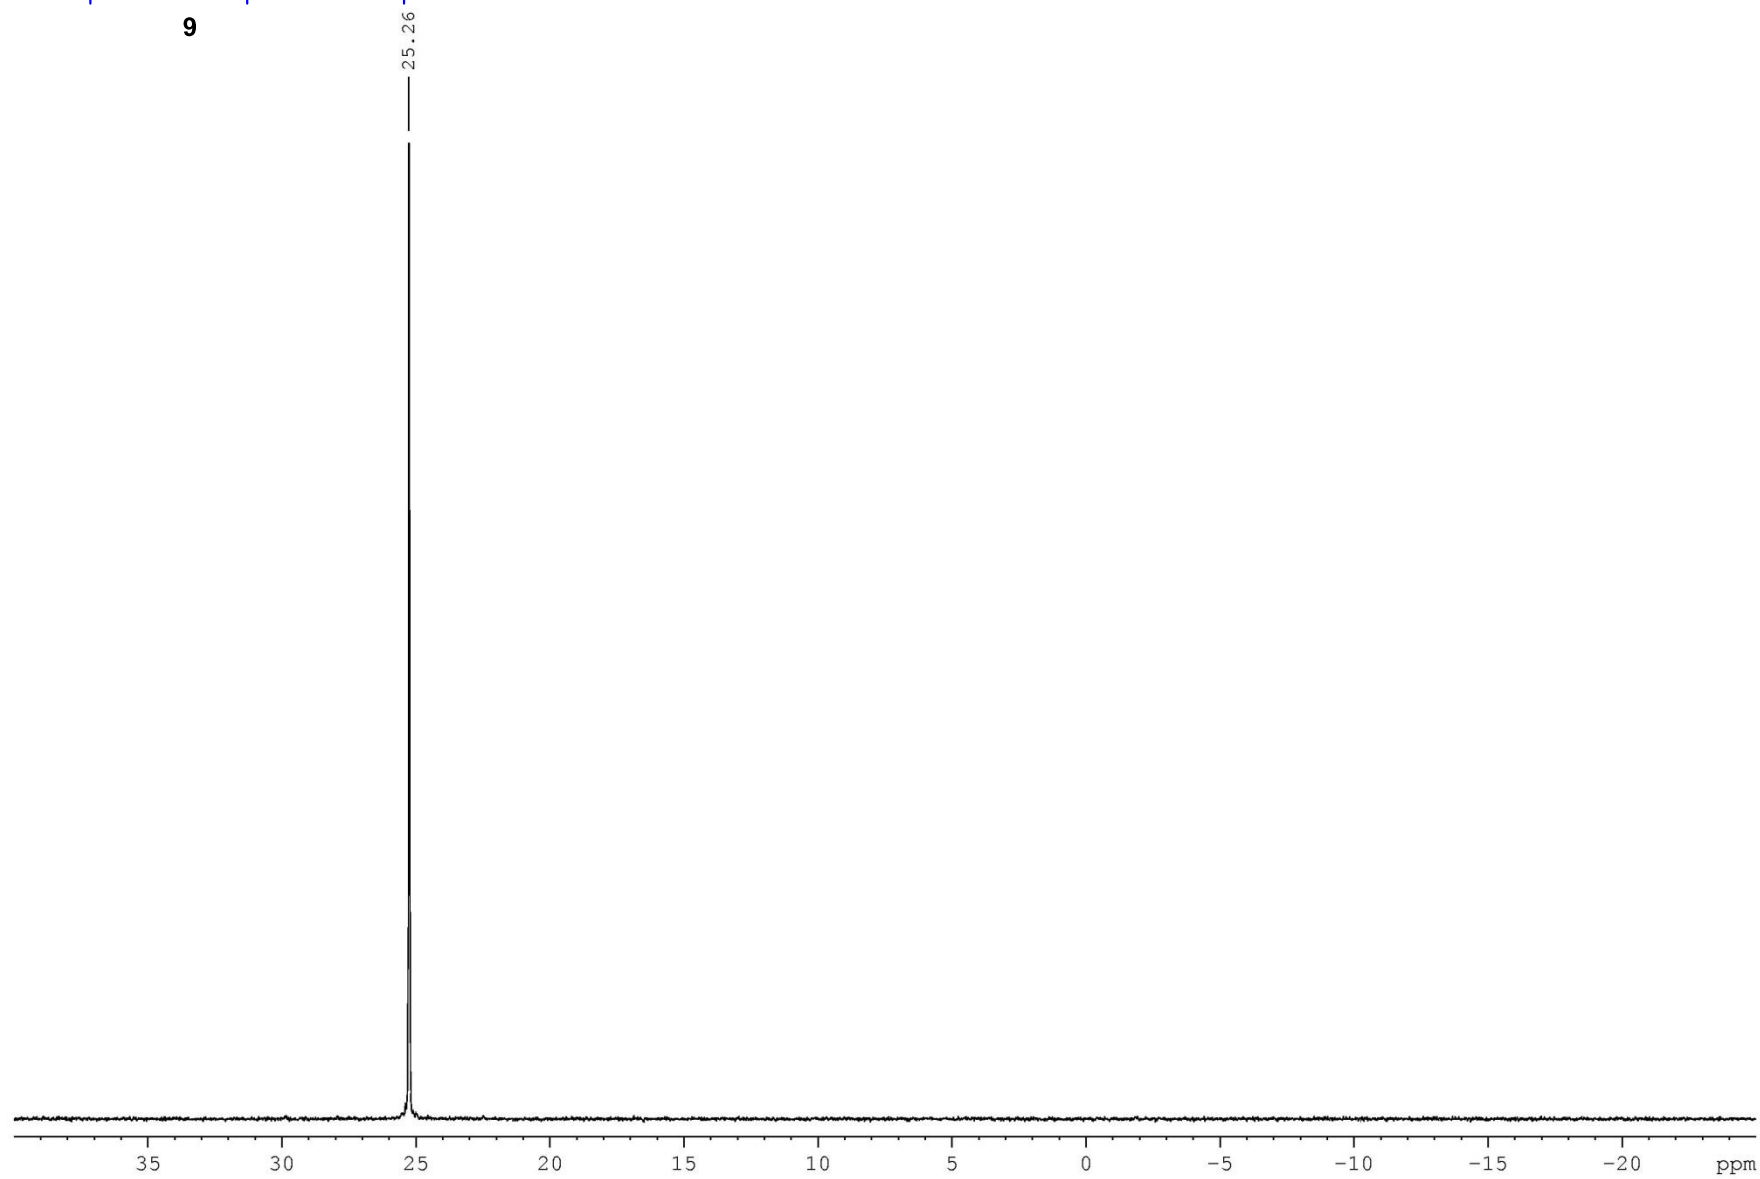

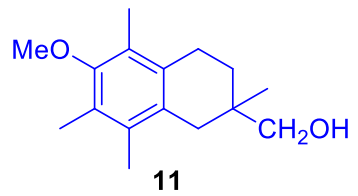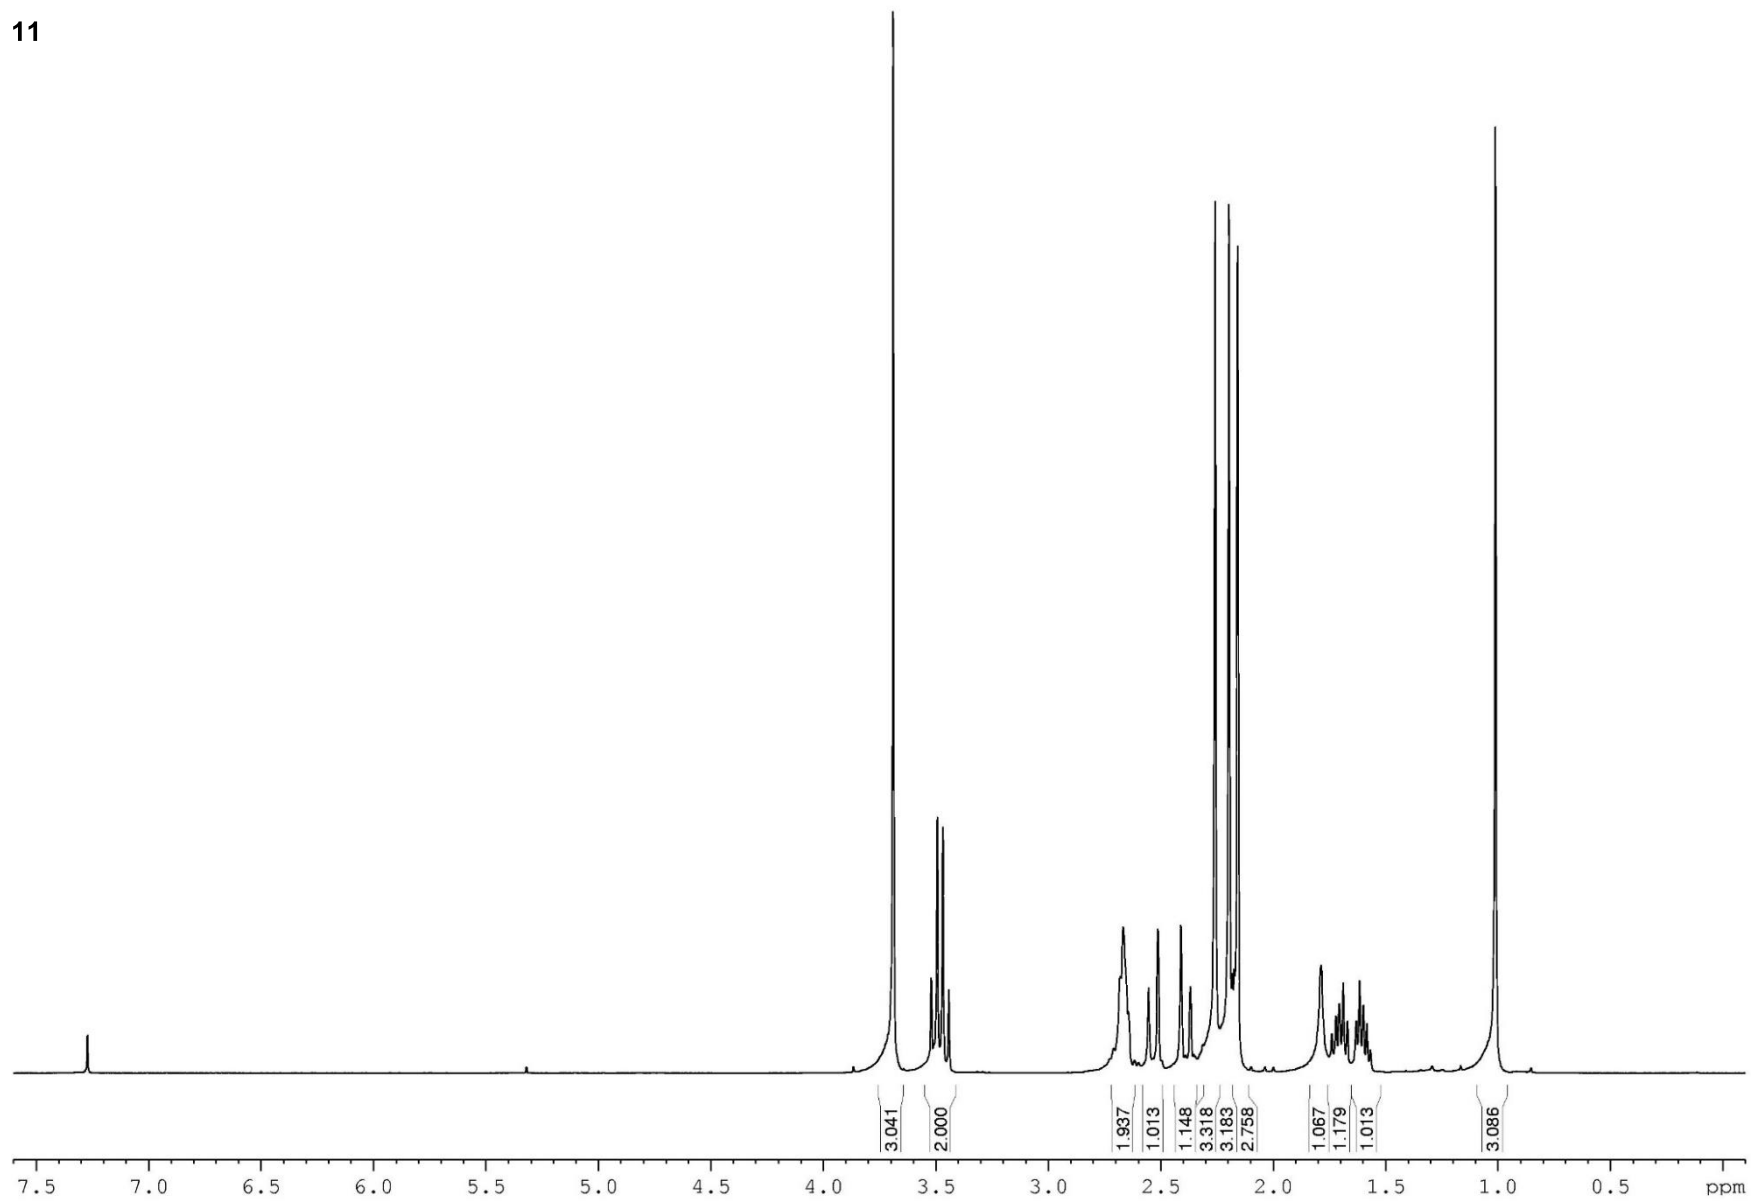

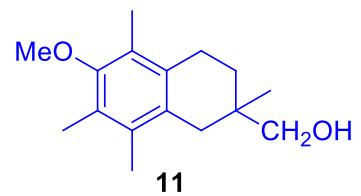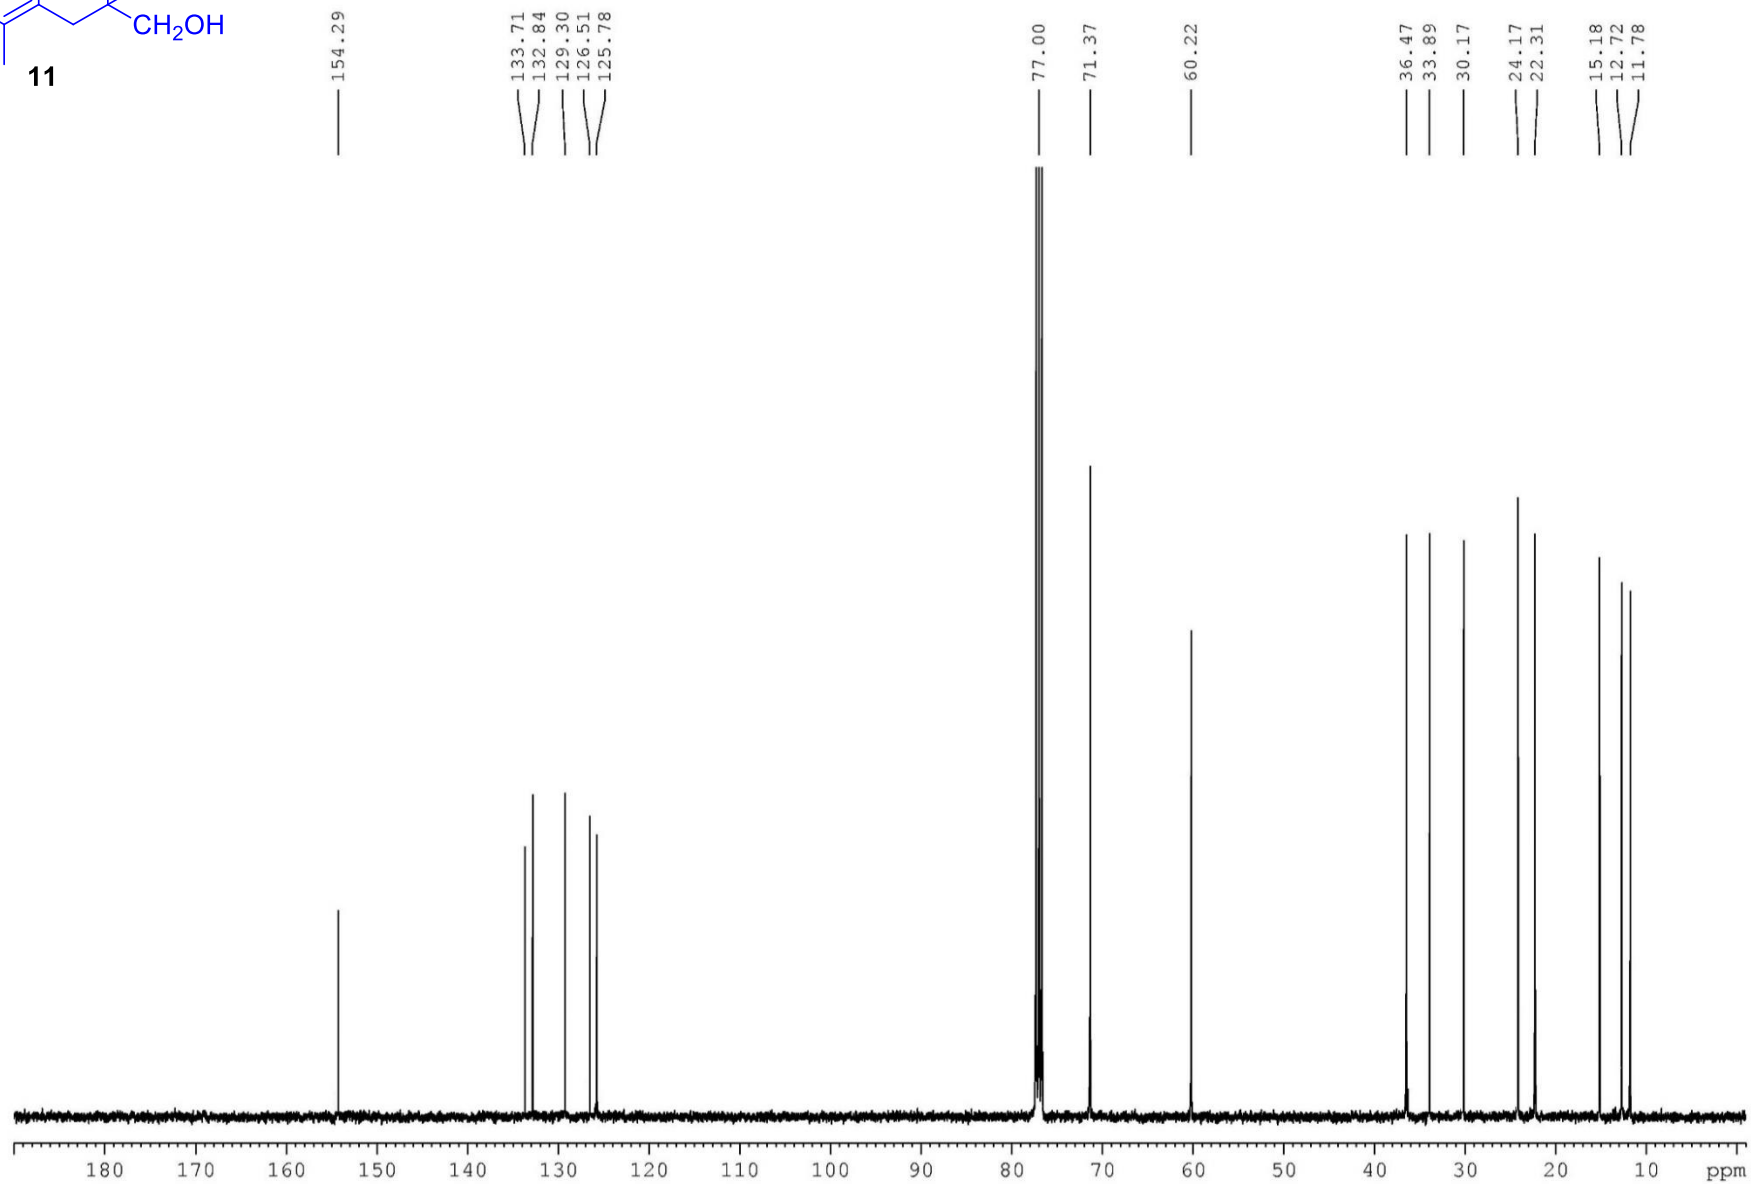

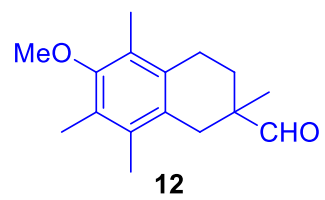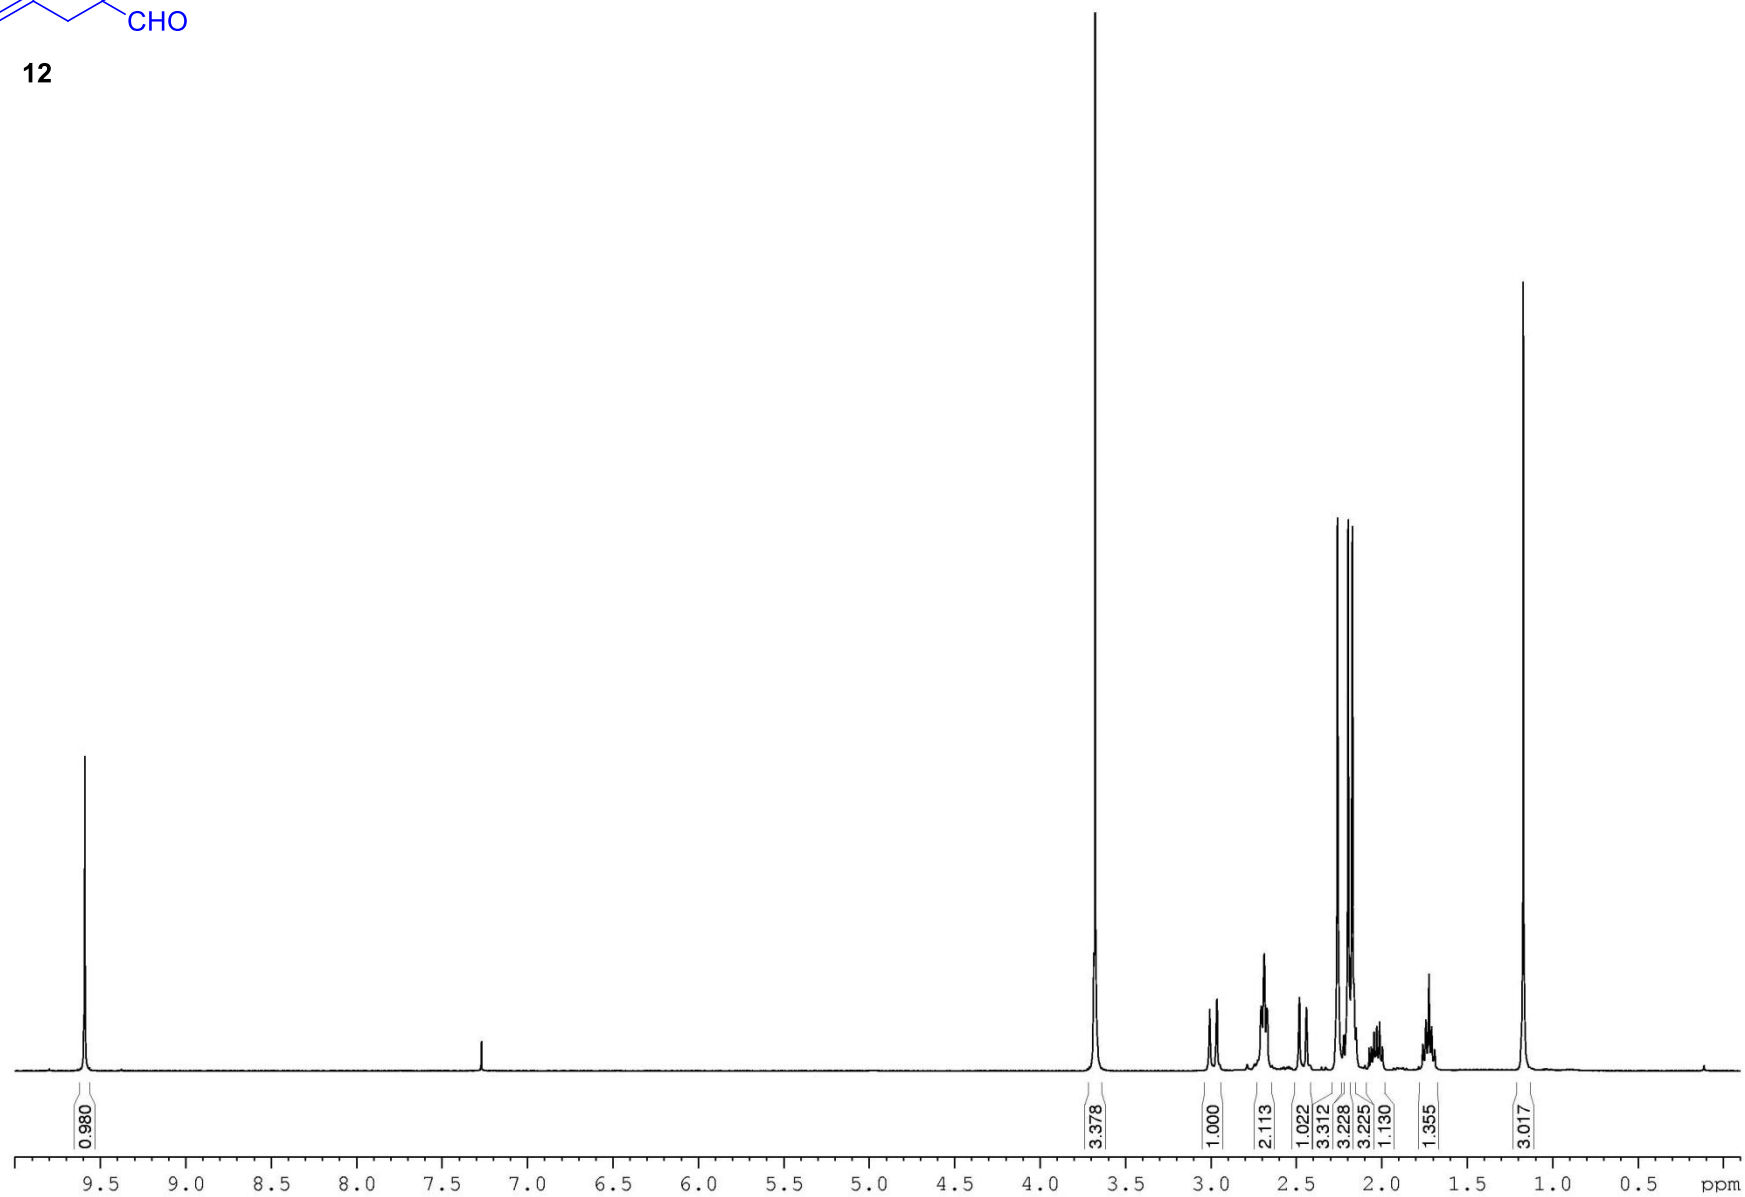

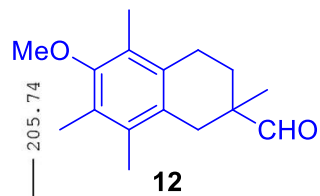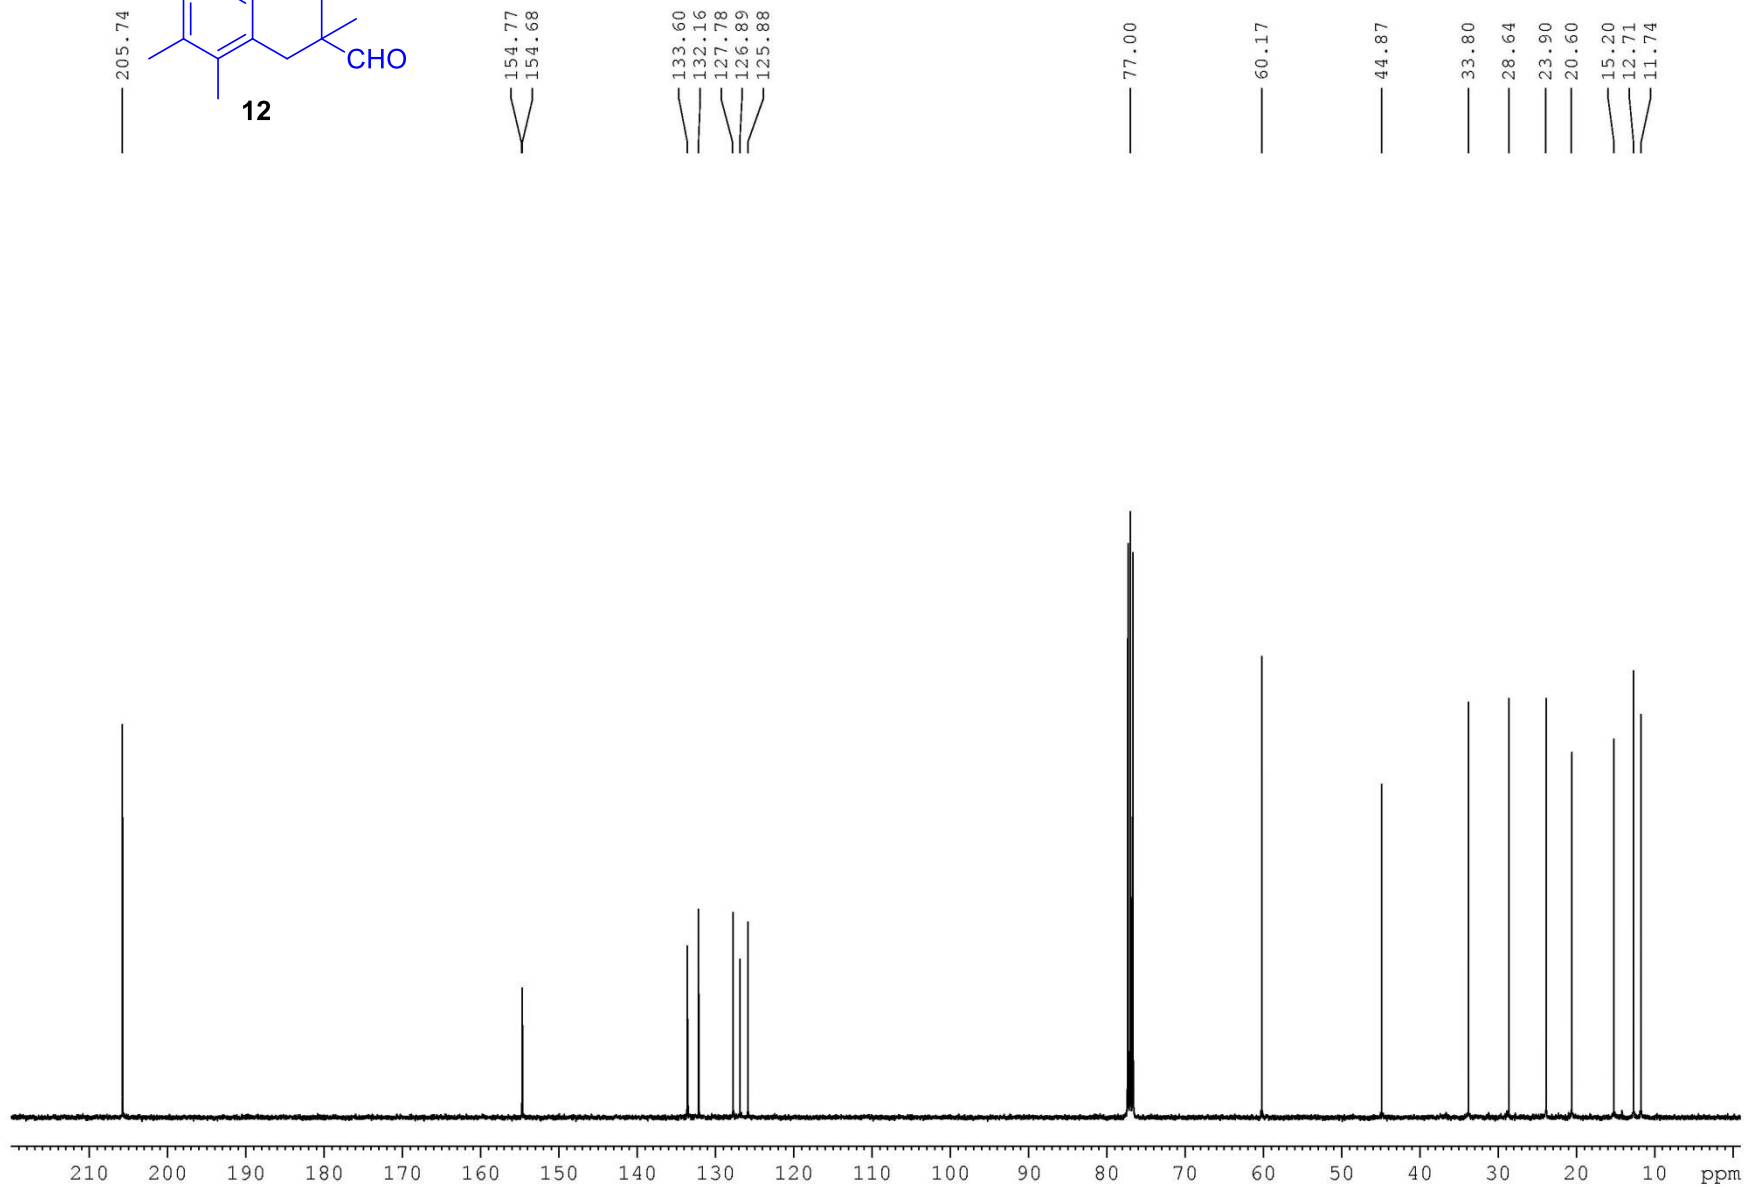



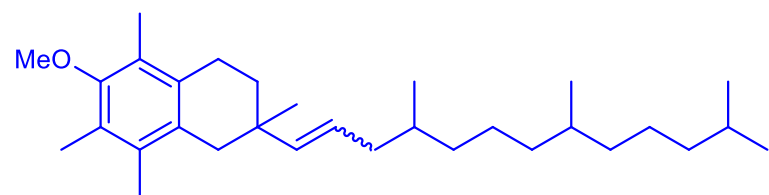

13

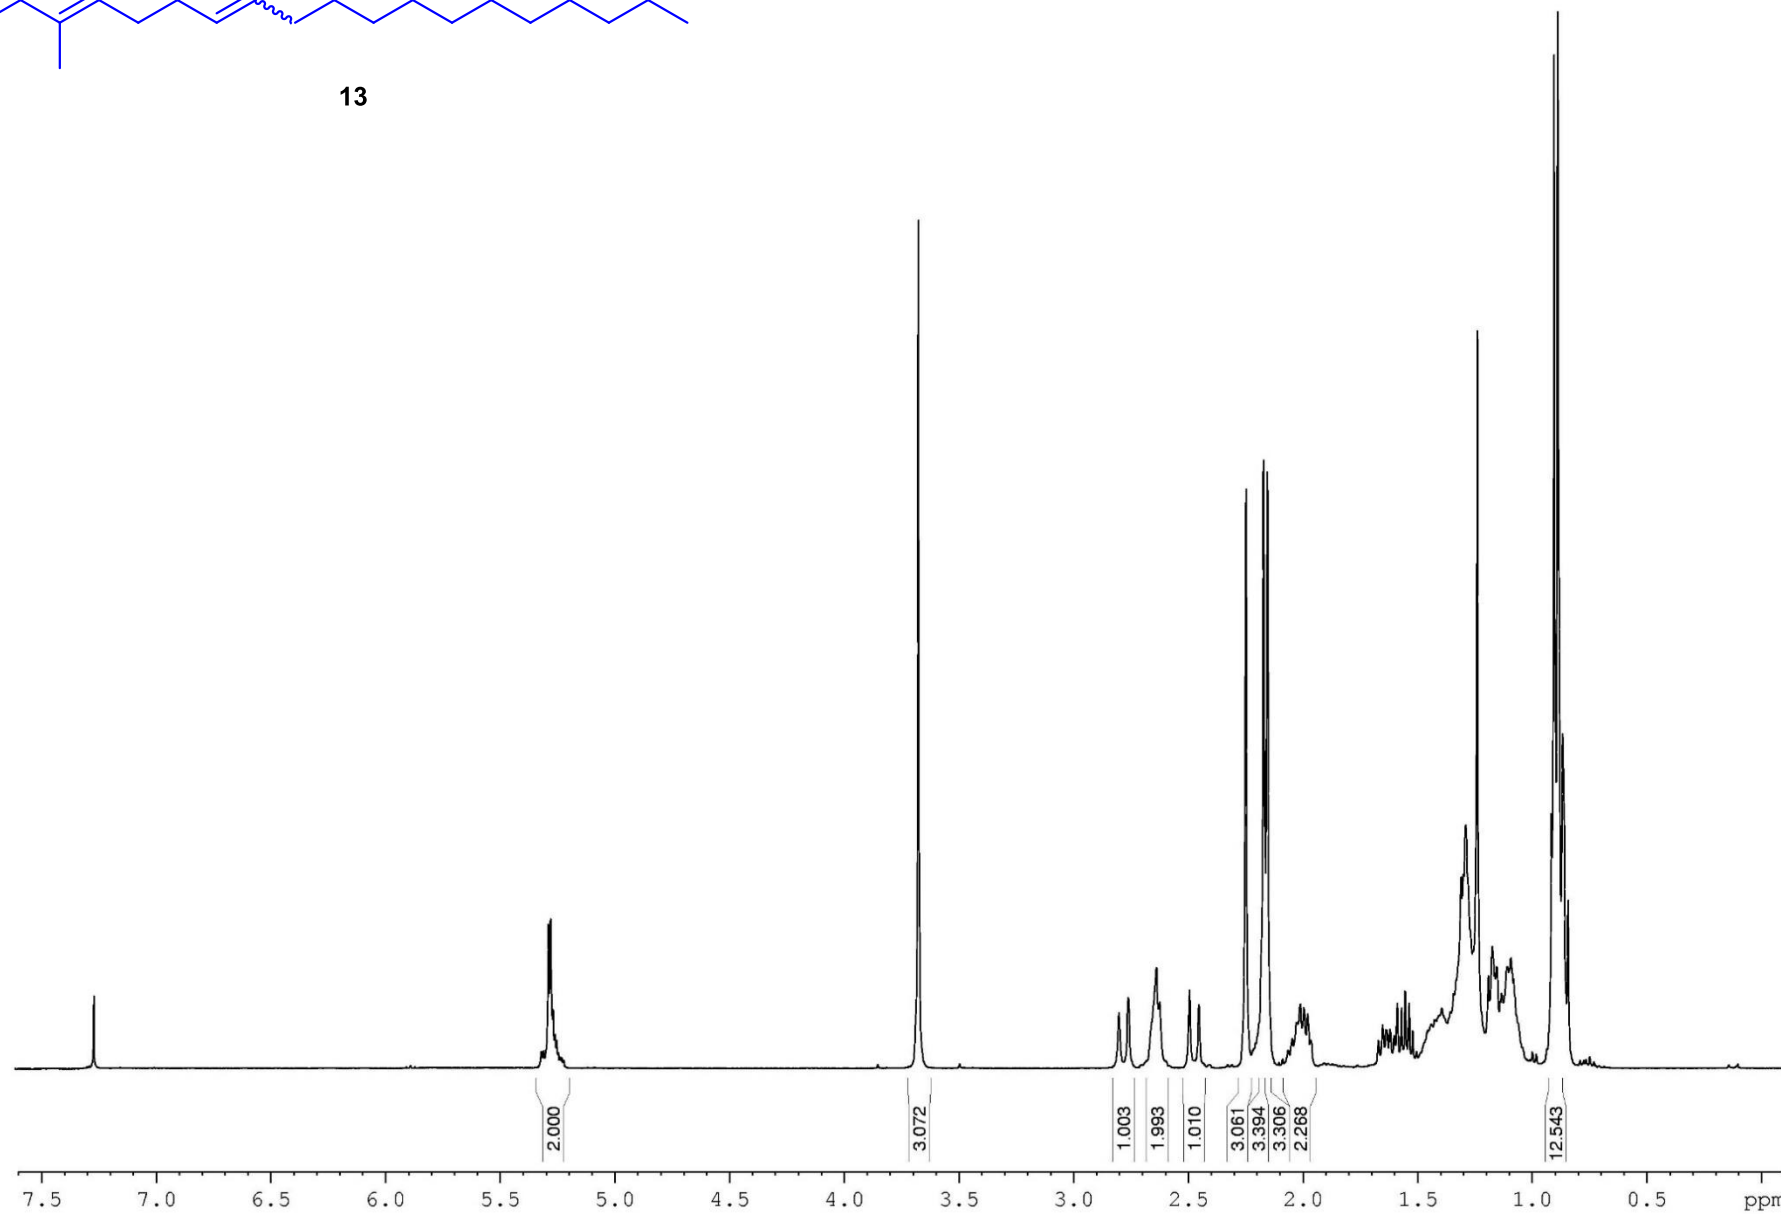

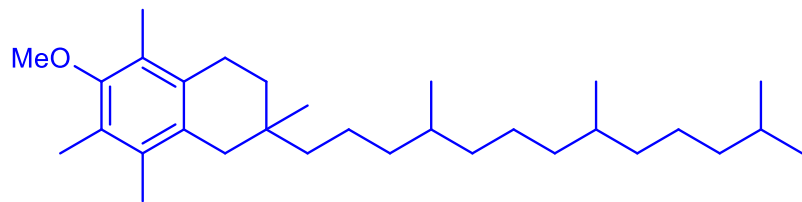

14

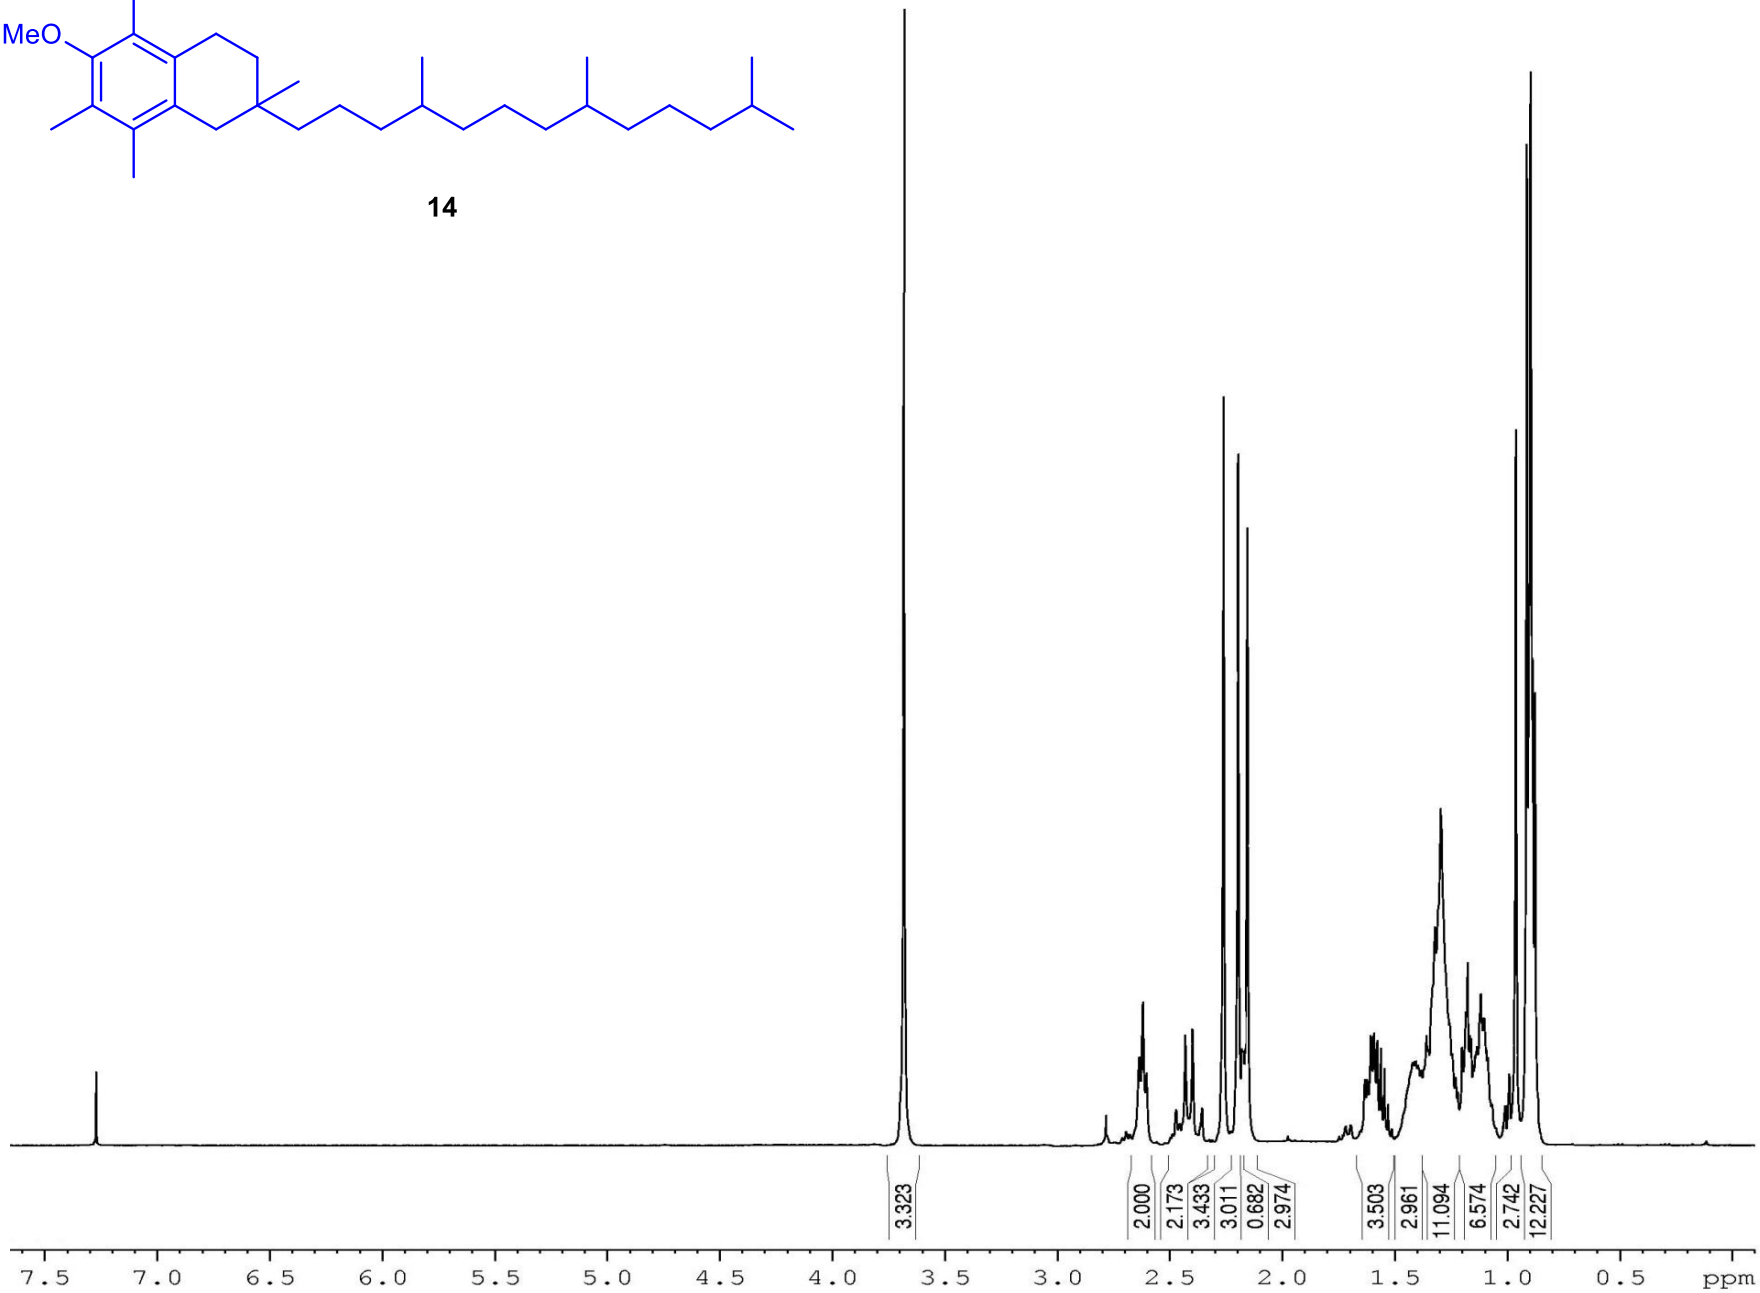

Supplement: antioxidants-08-00589-s001.pdf [file antioxidants-08-00589-s001.pdf]
